# Supplementary material for: Impacts of terminal modification of [Ru(phen)2dppz]2+on the luminescence properties: a theoretical study
Source: Royal Society of Chemistry journal article supplement (doi:10.1039/c5dt03373j), 2015-01-01
Supplement: c5dt03373j1.pdf [file c5dt03373j1.pdf]

# Impacts of Terminal Modification of $[\text{Ru}(\text{phen})_2\text{dppz}]^{2+}$ on the Luminescence Properties: a Theoretical Study

Xing Gao, Shuo Shi\*, Jun-Liang Yao, Juan Zhao, and Tian-Ming Yao\*

*<sup>a</sup>Department of Chemistry, Tongji University, Shanghai 200092, PR China<sup>1</sup>*

## Table of contents

|                                         |         |
|-----------------------------------------|---------|
| Figure S1 .....                         | S2      |
| Table S1 .....                          | S2      |
| Table S2 .....                          | S2      |
| Table S3 .....                          | S3      |
| Table S4 .....                          | S4      |
| Table S5 .....                          | S4      |
| Table S6 .....                          | S5      |
| Table S7 .....                          | S6      |
| Optimized Coordinates of Complex 1..... | S7-S9   |
| Optimized Coordinates of Complex 2..... | S10-S12 |
| Optimized Coordinates of Complex 3..... | S13-S15 |

---

\* Corresponding author. Tel.: +86-21-6598-3292; fax: +86-21-6598-2287.

*E-mail address:* [shishuo@tongji.edu.cn](mailto:shishuo@tongji.edu.cn) (S. Shi) [tmyao@tongji.edu.cn](mailto:tmyao@tongji.edu.cn) (T.M. Yao)

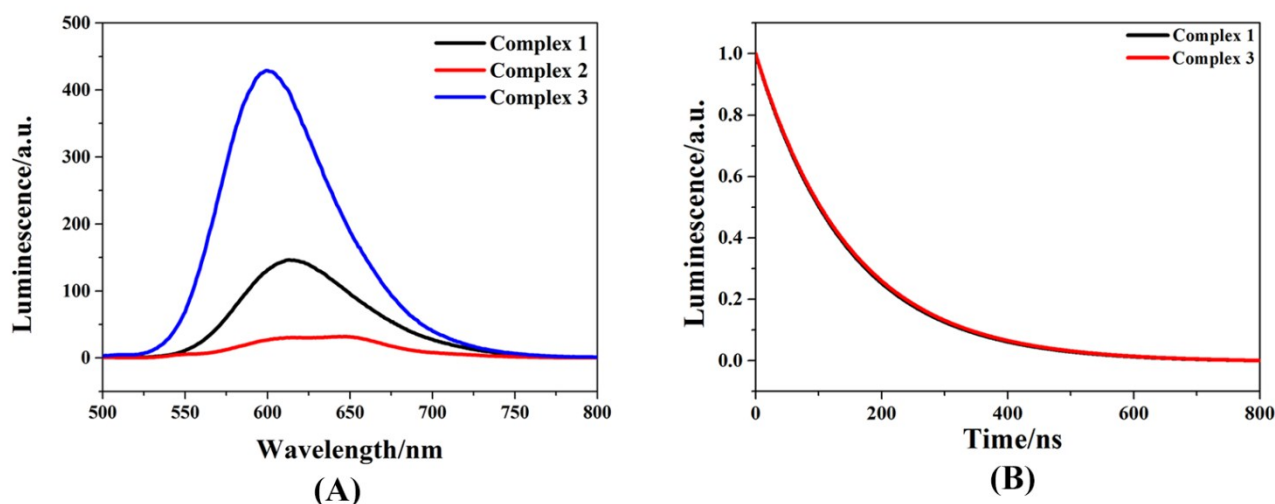

**Figure S1** (A) Emission spectra ( $\lambda_{\text{ex}}=440$  nm) of 5.0  $\mu\text{M}$   $[\text{Ru}(\text{phen})_2\text{dppz}]^{2+}$  (**1**),  $[\text{Ru}(\text{phen})_2\text{dppzi}]^{2+}$  (**2**), and  $[\text{Ru}(\text{phen})_2\text{dppz-idzo}]^{2+}$  (**3**) in acetonitrile; (B) Luminescence decays for  $[\text{Ru}(\text{phen})_2\text{dppz}]^{2+}$  (**1**, black curve) and  $[\text{Ru}(\text{phen})_2\text{dppz-idzo}]^{2+}$  (**3**, red curve) in acetonitrile..

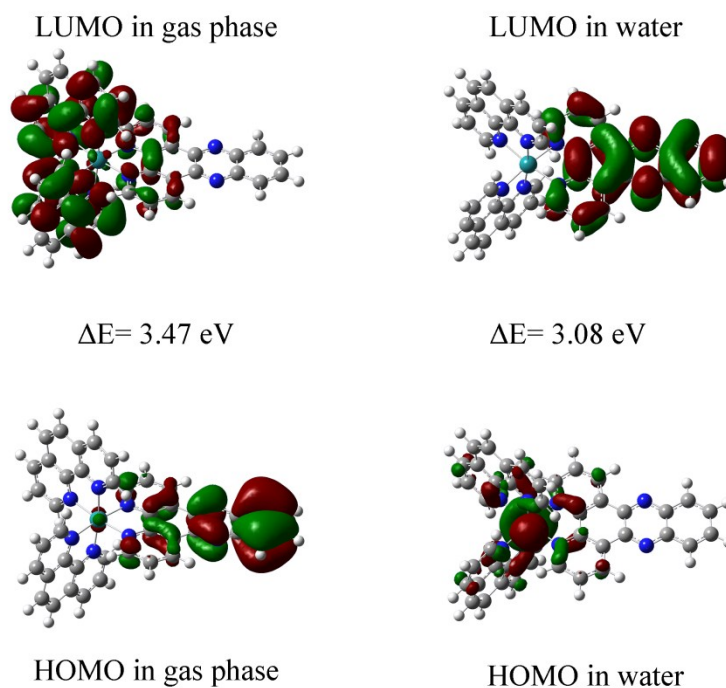

**Figure S2** The composition and energy gap of HOMO and LUMO of complex 1 in both gas phase and water.

**Table S1** Changes of the Mulliken charges distributions of different parts of the complexes.

|                      | 1 in gas phase | 1 in aqueous solution | 2 in gas phase | 2 in aqueous solution | 3 in gas phase | 3 in aqueous solution |
|----------------------|----------------|-----------------------|----------------|-----------------------|----------------|-----------------------|
| <b>Coligand 1</b>    | 0.20039        | 0.20475               | 0.19505        | 0.20247               | 0.19409        | 0.20129               |
| <b>Coligand 2</b>    | 0.20038        | 0.20473               | 0.19433        | 0.20244               | 0.19409        | 0.20129               |
| <b>Ruthenium(II)</b> | 1.37801        | 1.41126               | 1.37765        | 1.40974               | 1.37744        | 1.40881               |
| <b>Main ligand</b>   | 0.22122        | 0.17926               | 0.23296        | 0.18534               | 0.23438        | 0.18861               |

|                |         |         |         |         |         |         |
|----------------|---------|---------|---------|---------|---------|---------|
| Sum of charges | 2.00000 | 2.00000 | 1.99999 | 1.99999 | 2.00000 | 2.00000 |
|----------------|---------|---------|---------|---------|---------|---------|

**Table S2 TD-DFT calculated energies, oscillator strengths ( $f$ ), and natural transition orbital analysis results of the ten lowest-energy singlet and triplet excited states of  $[\text{Ru}(\text{phen})_2\text{dppzi}]^{2+}(\mathbf{2})$  in gas phase.**

| Excited State     | $\lambda_{\text{abs}}/\text{nm}(\text{eV})$ | $f$    | NTO Results                                                                   |
|-------------------|---------------------------------------------|--------|-------------------------------------------------------------------------------|
| <sup>3</sup> ES1  | 682.44(1.8168)                              | 0.0000 | <sup>3</sup> LLCT(98.8%) <sup>a</sup>                                         |
| <sup>3</sup> ES2  | 514.39(2.4103)                              | 0.0000 | <sup>3</sup> MLCT(94.9%) <sup>b</sup>                                         |
| <sup>3</sup> ES3  | 509.08(2.4355)                              | 0.0000 | <sup>3</sup> MLCT (94.7%)                                                     |
| <sup>1</sup> ES1  | 506.90(2.4459)                              | 0.0087 | <sup>1</sup> LLCT(98.9%) <sup>c</sup>                                         |
| <sup>3</sup> ES4  | 505.11(2.4546)                              | 0.0000 | <sup>3</sup> dppzi→phen*+bpy*(98.9%) <sup>d</sup>                             |
| <sup>3</sup> ES5  | 500.98(2.4748)                              | 0.0000 | <sup>3</sup> metal→phen*+bpy*(31.0%) <sup>e</sup><br><sup>3</sup> MLCT(63.1%) |
| <sup>1</sup> ES2  | 492.20(2.5190)                              | 0.0014 | <sup>1</sup> dppzi→L*(99.6%) <sup>f</sup>                                     |
| <sup>3</sup> ES6  | 486.23(2.5499)                              | 0.0000 | <sup>3</sup> MLCT(94.4%)                                                      |
| <sup>3</sup> ES7  | 484.28(2.5602)                              | 0.0000 | <sup>3</sup> dppzi→ phen*+bpy*(97.4%)                                         |
| <sup>3</sup> ES8  | 478.20(2.5927)                              | 0.0000 | <sup>3</sup> dppzi→phen*(99.2%) <sup>g</sup>                                  |
| <sup>1</sup> ES3  | 478.07(2.5934)                              | 0.0003 | <sup>1</sup> dppzi→phen*(99.9%) <sup>h</sup>                                  |
| <sup>3</sup> ES9  | 475.42(2.6079)                              | 0.0000 | <sup>3</sup> LLCT(91.9%)                                                      |
| <sup>1</sup> ES4  | 472.81(2.6223)                              | 0.0005 | <sup>1</sup> MLCT (99.2%) <sup>i</sup>                                        |
| <sup>3</sup> ES10 | 472.61(2.6234)                              | 0.0000 | <sup>3</sup> Metal→bpy*(95.2%) <sup>j</sup>                                   |
| <sup>1</sup> ES5  | 471.12(2.6317)                              | 0.0002 | <sup>1</sup> MLCT(99.6%)                                                      |
| <sup>1</sup> ES6  | 465.60(2.6629)                              | 0.0013 |                                                                               |
| <sup>1</sup> ES7  | 454.94(2.7253)                              | 0.0007 |                                                                               |
| <sup>1</sup> ES8  | 446.70(2.7756)                              | 0.001  |                                                                               |
| <sup>1</sup> ES9  | 445.47(2.7832)                              | 0.0003 |                                                                               |
| <sup>1</sup> ES10 | 444.90(2.7868)                              | 0.0103 |                                                                               |

<sup>a</sup> <sup>3</sup>LLCT was considered as <sup>3</sup>dppzi→dppzi\* transition in the context; <sup>b</sup> <sup>3</sup>MLCT was referring to <sup>3</sup>metal→phen\* in the context; <sup>c</sup> <sup>1</sup>LLCT was referring as dppzi→dppzi\* transition in the context; <sup>d</sup> <sup>3</sup>dppzi→phen\*+bpy\* was considered to be the triplet transition from the  $\pi$ -extended ligand DPPZI to the coligand and bpy part of dppzi. <sup>e</sup> <sup>3</sup>Metal→(Phen\*+bpy\*) was treated as <sup>3</sup>Metal→L\*, for it contained both coligand and main ligand parts; <sup>f</sup> <sup>1</sup>dppzi→L\* meant the transition was originating from dppzi ligand to all parts of the ligands; <sup>g</sup> <sup>3</sup>Dppzi→phen\* was the triplet transition from DPPZI ligand to only coligands; <sup>h</sup> <sup>1</sup>dppzi→phen\* was the singlet transition from dppzi ligand to only coligands; <sup>i</sup> <sup>1</sup>MLCT was singlet transition referring <sup>1</sup> metal→phen\* in the context; <sup>j</sup> <sup>3</sup>Metal→bpy\* was the triplet transition from metal to bpy part of the dppzi ligand.

**Table S3 TD-DFT calculated energies, oscillator strengths ( $f$ ), and natural transition orbital analysis results of the ten lowest-energy singlet and triplet excited states of  $[\text{Ru}(\text{phen})_2\text{dppz-idzo}]^{2+}(\mathbf{3})$  in gas phase.**

| Excited State    | $\lambda_{\text{abs}}/\text{nm}(\text{eV})$ | $f$    | NTO Results                           |
|------------------|---------------------------------------------|--------|---------------------------------------|
| <sup>3</sup> ES1 | 557.13(2.2254)                              | 0.0000 | <sup>3</sup> LLCT(92.3%) <sup>a</sup> |
| <sup>3</sup> ES2 | 550.16(2.2536)                              | 0.0000 | <sup>3</sup> LLCT(99.5%)              |

|                   |                |        |                                                                               |
|-------------------|----------------|--------|-------------------------------------------------------------------------------|
| <sup>3</sup> ES3  | 514.82(2.4083) | 0.0000 | <sup>3</sup> MLCT (94.8%) <sup>b</sup>                                        |
| <sup>3</sup> ES4  | 509.56(2.4332) | 0.0000 | <sup>3</sup> MLCT(94.6%)                                                      |
| <sup>3</sup> ES5  | 502.30(2.4683) | 0.0000 | <sup>3</sup> metal→phen*+bpy*(35.2%) <sup>c</sup><br><sup>3</sup> MLCT(57.5%) |
| <sup>3</sup> ES6  | 491.16(2.5243) | 0.0000 | <sup>3</sup> Metal+dppz-idzo→bpy*(91.3%) <sup>d</sup>                         |
| <sup>3</sup> ES7  | 487.39(2.5438) | 0.0000 | <sup>3</sup> Metal+L→phen*(38.4%) <sup>e</sup><br><sup>3</sup> MLCT(57.1%)    |
| <sup>1</sup> ES1  | 473.14(2.6205) | 0.0006 | <sup>1</sup> MLCT(99.5%)                                                      |
| <sup>3</sup> ES8  | 472.68(2.6230) | 0.0000 |                                                                               |
| <sup>3</sup> ES9  | 472.08(2.6263) | 0.0000 |                                                                               |
| <sup>1</sup> ES2  | 471.61(2.6290) | 0.0010 | <sup>1</sup> MLCT(97.6%)                                                      |
| <sup>1</sup> ES3  | 470.6(2.6346)  | 0.0266 | <sup>1</sup> Metal+dppz-idzo→phen*+bpy*(97.0%) <sup>f</sup>                   |
| <sup>3</sup> ES10 | 462.54(2.6805) | 0.0000 |                                                                               |
| <sup>1</sup> ES4  | 457.83(2.7081) | 0.0011 |                                                                               |
| <sup>1</sup> ES5  | 450.66(2.7512) | 0.0892 |                                                                               |
| <sup>1</sup> ES6  | 444.79(2.7875) | 0.0027 |                                                                               |
| <sup>1</sup> ES7  | 442.67(2.8008) | 0.0012 |                                                                               |
| <sup>1</sup> ES8  | 438.26(2.8290) | 0.0194 |                                                                               |
| <sup>1</sup> ES9  | 436.20(2.8424) | 0.0143 |                                                                               |
| <sup>1</sup> ES10 | 433.96(2.8571) | 0.0013 |                                                                               |

<sup>a3</sup>LLCT was considered as <sup>3</sup>dppz-idzo→dppz-idzo \* transition in the context; <sup>b</sup> <sup>3</sup>MLCT was referring to <sup>3</sup>metal→phen\* in the context; <sup>c3</sup>Metal→(Phen\*+bpy\*) was treated as <sup>3</sup>Metal→L\*, for the excited orbitals contained both coligand and main ligand parts; <sup>d</sup> <sup>3</sup>Metal+dppz-idzo→bpy\* meant the electron transition was originating from metal center and main ligand and transferred to the antibonding orbitals of bpy parts; <sup>e</sup> <sup>3</sup>Metal+L→phen\* was a transition from all the complexes to the coligands; <sup>f</sup> <sup>1</sup>Metal+dppz-idzo→phen\*+bpy\* was a singlet transition from metal center and main ligand dppz-idzo and excited to coligands and bpy part.

**Table S4 TD-DFT calculated energies, oscillator strengths (*f*), and natural transition orbital analysis results of the ten lowest-energy singlet and triplet excited states of [Ru(phen)<sub>2</sub>dppz]<sup>2+</sup>(1) in aqueous solution.**

| Excited State    | $\lambda_{\text{abs}}/\text{nm}(\text{eV})$ | <i>f</i> | NTO Results                                                                           |
|------------------|---------------------------------------------|----------|---------------------------------------------------------------------------------------|
| <sup>3</sup> ES1 | 540.65(2.2932)                              | 0.0000   | <sup>3</sup> metal→bpy*(16.3%) <sup>a</sup><br><sup>3</sup> LLCT (81.7%) <sup>b</sup> |
| <sup>3</sup> ES2 | 510.21(2.4300)                              | 0.0000   | <sup>3</sup> LLCT(12.9%) <sup>c</sup><br><sup>3</sup> metal→dppz*(83.6%) <sup>d</sup> |
| <sup>3</sup> ES3 | 506.25(2.4491)                              | 0.0000   | <sup>3</sup> MLCT(93.7%) <sup>e</sup>                                                 |
| <sup>3</sup> ES4 | 500.34(2.4780)                              | 0.0000   | <sup>3</sup> MLCT(28.2%)<br><sup>3</sup> Metal→bpy*(66.9%)                            |
| <sup>3</sup> ES5 | 500.08(2.4793)                              | 0.0000   | <sup>3</sup> MLCT(21.2%)<br><sup>3</sup> metal→phen*+bpy*(72.2%)                      |
| <sup>1</sup> ES1 | 494.62(2.5066)                              | 0.0001   | <sup>1</sup> metal→dppz*(99.9%)                                                       |
| <sup>3</sup> ES6 | 481.87(2.5730)                              | 0.0000   |                                                                                       |
| <sup>3</sup> ES7 | 478.50(2.5911)                              | 0.0000   |                                                                                       |

|                   |                |        |                                                                 |
|-------------------|----------------|--------|-----------------------------------------------------------------|
| <sup>3</sup> ES8  | 476.38(2.6026) | 0.0000 |                                                                 |
| <sup>3</sup> ES9  | 472.59(2.6235) | 0.0000 |                                                                 |
| <sup>3</sup> ES10 | 470.42(2.6356) | 0.0000 |                                                                 |
| <sup>1</sup> ES2  | 465.17(2.6653) | 0.0026 | <sup>1</sup> metal→L*(22.6%)<br><sup>1</sup> metal→dppz*(76.8%) |
| <sup>1</sup> ES3  | 465.06(2.6660) | 0.0008 | <sup>1</sup> MLCT(83.9%)<br><sup>1</sup> metal→dppz*(16.0%)     |
| <sup>1</sup> ES4  | 463.70(2.6738) | 0.0382 | <sup>1</sup> MLCT(43.0%)<br><sup>1</sup> metal→dppz*(56.8%)     |
| <sup>1</sup> ES5  | 462.39(2.6814) | 0.0332 | <sup>1</sup> MLCT(42.5%)<br><sup>1</sup> metal→dppz*(57.3%)     |
| <sup>1</sup> ES6  | 461.66(2.6856) | 0.0008 |                                                                 |
| <sup>1</sup> ES7  | 437.75(2.8323) | 0.0005 |                                                                 |
| <sup>1</sup> ES8  | 436.12(2.8429) | 0.0182 |                                                                 |
| <sup>1</sup> ES9  | 434.51(2.8534) | 0.0156 |                                                                 |
| <sup>1</sup> ES10 | 422.32(2.9358) | 0.0194 |                                                                 |

**Table S5 TD-DFT calculated energies, oscillator strengths (*f*), and natural transition orbital analysis results of the ten lowest-energy singlet and triplet excited states of [Ru(phen)<sub>2</sub>dppzi]<sup>2+</sup>(2) in aqueous solution.**

| Excited State     | $\lambda_{\text{abs}}/\text{nm}(\text{eV})$ | <i>f</i> | NTO Results                                                       |
|-------------------|---------------------------------------------|----------|-------------------------------------------------------------------|
| <sup>3</sup> ES1  | 633.01(1.9587)                              | 0.0000   | <sup>3</sup> LLCT(96.8%)                                          |
| <sup>3</sup> ES2  | 511.86(2.4222)                              | 0.0000   | <sup>3</sup> metal→bpy*(92.5%)                                    |
| <sup>3</sup> ES3  | 507.91(2.4411)                              | 0.0000   | <sup>3</sup> MLCT(94.1%)                                          |
| <sup>3</sup> ES4  | 501.35(2.4730)                              | 0.0000   | <sup>3</sup> MLCT(20.0%)<br><sup>3</sup> metal→phen *+bpy*(73.6%) |
| <sup>3</sup> ES5  | 499.55(2.4819)                              | 0.0000   | <sup>3</sup> MLCT(35.0%)<br><sup>3</sup> metal→bpy*(59.3%)        |
| <sup>1</sup> ES1  | 491.06(2.5248)                              | 0.0001   | <sup>1</sup> metal→dppzi*(99.8%)                                  |
| <sup>3</sup> ES6  | 482.02(2.5722)                              | 0.0000   |                                                                   |
| <sup>3</sup> ES7  | 478.81(2.5894)                              | 0.0000   |                                                                   |
| <sup>3</sup> ES8  | 478.48(2.5912)                              | 0.0000   |                                                                   |
| <sup>3</sup> ES9  | 474.69(2.6119)                              | 0.0000   |                                                                   |
| <sup>3</sup> ES10 | 467.91(2.6497)                              | 0.0000   |                                                                   |
| <sup>1</sup> ES2  | 466.75(2.6564)                              | 0.0011   | <sup>1</sup> MLCT(99.6%)                                          |
| <sup>1</sup> ES3  | 464.82(2.6674)                              | 0.0015   |                                                                   |
| <sup>1</sup> ES4  | 461.96(2.6838)                              | 0.0020   |                                                                   |
| <sup>1</sup> ES5  | 460.87(2.6902)                              | 0.0983   |                                                                   |
| <sup>1</sup> ES6  | 458.85(2.7020)                              | 0.0009   |                                                                   |
| <sup>1</sup> ES7  | 440.23(2.8163)                              | 0.0194   |                                                                   |
| <sup>1</sup> ES8  | 438.39(2.8282)                              | 0.0062   |                                                                   |
| <sup>1</sup> ES9  | 435.95(2.8440)                              | 0.0114   |                                                                   |
| <sup>1</sup> ES10 | 434.66(2.8525)                              | 0.0159   |                                                                   |

**Table S6 TD-DFT calculated energies, oscillator strengths (*f*), and natural transition orbital analysis results of the ten lowest-energy singlet and triplet excited states of [Ru(phen)<sub>2</sub>dppz-idzo]<sup>2+</sup>(3) in aqueous solution.**

| Excited State     | $\lambda_{\text{abs/nm(eV)}}$ | $f$    | NTO Results                                                                                 |
|-------------------|-------------------------------|--------|---------------------------------------------------------------------------------------------|
| <sup>3</sup> ES1  | 543.76(2.2801)                | 0.0000 | <sup>3</sup> metal→bpy*(9.1%)<br><sup>3</sup> LLCT(89.3%)                                   |
| <sup>3</sup> ES2  | 508.79(2.4369)                | 0.0000 | <sup>3</sup> MLCT(94.2%)                                                                    |
| <sup>3</sup> ES3  | 506.52(2.4477)                | 0.0000 | <sup>3</sup> LLCT(5.3%)<br><sup>3</sup> MLCT(14.2%)<br><sup>3</sup> metal→phen*+bpy*(75.7%) |
| <sup>3</sup> ES4  | 501.61(2.4717)                | 0.0000 | <sup>3</sup> MLCT (11.1%)<br><sup>3</sup> metal→bpy*(16.6%)<br><sup>3</sup> LLCT(69.1%)     |
| <sup>3</sup> ES5  | 499.23(2.4835)                | 0.0000 | <sup>3</sup> LLCT (5.1%)<br><sup>3</sup> MLCT(6.6%)<br><sup>3</sup> metal→phen*+bpy*(78.7%) |
| <sup>3</sup> ES6  | 498.52(2.4871)                | 0.0000 | <sup>3</sup> MLCT(28.2%)<br><sup>3</sup> metal→dppz-idzo*(68.3%)                            |
| <sup>3</sup> ES7  | 480.80(2.5787)                | 0.0000 | <sup>3</sup> MLCT(38.7%)<br><sup>3</sup> metal→bpy*(56.8%)                                  |
| <sup>1</sup> ES1  | 479.44(2.5860)                | 0.0000 | <sup>1</sup> metal→dppz-idzo*(99.8%)                                                        |
| <sup>3</sup> ES8  | 479.10(2.5879)                | 0.0000 |                                                                                             |
| <sup>1</sup> ES2  | 467.57(2.6517)                | 0.0009 | <sup>1</sup> MLCT(99.7%)                                                                    |
| <sup>1</sup> ES3  | 465.65(2.6626)                | 0.0000 | <sup>1</sup> MLCT(99.5%)                                                                    |
| <sup>3</sup> ES9  | 462.15(2.6828)                | 0.0000 |                                                                                             |
| <sup>3</sup> ES10 | 458.46(2.7043)                | 0.0000 |                                                                                             |
| <sup>1</sup> ES4  | 450.41(2.7527)                | 0.0030 |                                                                                             |
| <sup>1</sup> ES5  | 446.38(2.7775)                | 0.2213 |                                                                                             |
| <sup>1</sup> ES6  | 444.80(2.7874)                | 0.0014 |                                                                                             |
| <sup>1</sup> ES7  | 439.17(2.8232)                | 0.0097 |                                                                                             |
| <sup>1</sup> ES8  | 435.78(2.8451)                | 0.0051 |                                                                                             |
| <sup>1</sup> ES9  | 425.94(2.91080)               | 0.0643 |                                                                                             |
| <sup>1</sup> ES10 | 424.14(2.9232)                | 0.0076 |                                                                                             |

**Table S7** Sum of the SOC integral between  $S_i$  ( $i=1-6$ ) and <sup>3</sup>LLCT or <sup>3</sup>MLCT as well as the radiative rate constant ( $k_r$ ), and the ratio of  $(\sum \langle S_i | H_{\text{SO}} | ^3\text{MLCT} \rangle)^2 / (\sum \langle S_i | H_{\text{SO}} | ^3\text{LLCT} \rangle)^2$  in gas phase and water solution.

|         |                                                                                | Gas phase              |                                                                                                                               |  |
|---------|--------------------------------------------------------------------------------|------------------------|-------------------------------------------------------------------------------------------------------------------------------|--|
| Complex | $\sum \langle S_i   H_{\text{SO}}   ^3\text{LLCT} \rangle$ (cm <sup>-1</sup> ) | $k_r(^3\text{LLCT})^a$ |                                                                                                                               |  |
| 1       | 54.5                                                                           | 4.30E-04               |                                                                                                                               |  |
| 2       | 2.44                                                                           | 5.77E-05               |                                                                                                                               |  |
| 3       | 17.0                                                                           | 2.79E-01               |                                                                                                                               |  |
| Complex | $\sum \langle S_i   H_{\text{SO}}   ^3\text{MLCT} \rangle$ (cm <sup>-1</sup> ) | $k_r(^3\text{MLCT})$   | $(\sum \langle S_i   H_{\text{SO}}   ^3\text{MLCT} \rangle)^2 / (\sum \langle S_i   H_{\text{SO}}   ^3\text{LLCT} \rangle)^2$ |  |
| 1       | 667.5                                                                          | 2.00E+03               | 150                                                                                                                           |  |
| 2       | 222.4                                                                          | 4.78E+03               | 8308                                                                                                                          |  |
| 3       | 443.5                                                                          | 1.35E+03               | 680                                                                                                                           |  |

| <b>Water</b>   |                                                              |               |                                                                                         |
|----------------|--------------------------------------------------------------|---------------|-----------------------------------------------------------------------------------------|
| <b>Complex</b> | $\Sigma\langle S_i H_{So} ^3LLCT\rangle$ (cm <sup>-1</sup> ) | $k_r(^3LLCT)$ |                                                                                         |
| <b>1</b>       | 439.5                                                        | 1.75E+00      |                                                                                         |
| <b>2</b>       | 39.4                                                         | 4.24E-01      |                                                                                         |
| <b>3</b>       | 176.0                                                        | 2.00E+01      |                                                                                         |
| <b>Complex</b> | $\Sigma\langle S_i H_{So} ^3MLCT\rangle$ (cm <sup>-1</sup> ) | $k_r(^3MLCT)$ | $(\Sigma\langle S_i H_{So} ^3MLCT\rangle)^2/(\Sigma\langle S_i H_{So} ^3LLCT\rangle)^2$ |
| <b>1</b>       | 391.9                                                        | 3.08E+03      | 0.80                                                                                    |
| <b>2</b>       | 329.3                                                        | 8.95E+03      | 69.8                                                                                    |
| <b>3</b>       | 326.0                                                        | 1.88E+04      | 3.43                                                                                    |

a. The  $k_r$  was obtained from eq 1 and 2, at the optimized structures of <sup>3</sup>LLCT and <sup>3</sup>MLCT states.

1. Coordinates of optimized structure of [Ru(phen)<sub>2</sub>dppz]<sup>2+</sup>  
(Complex 1) in gas phase at B3LYP//SDD/ 6-311G\*\* level. E = -  
2149.32972436 Hartree.

|    |             |             |             |
|----|-------------|-------------|-------------|
| Ru | 1.15321677  | -0.00013160 | 0.00002317  |
| N  | 2.65670488  | -1.06183951 | -1.03608227 |
| C  | 2.94451252  | -2.27832449 | -0.48194332 |
| C  | 3.34061152  | -0.68758394 | -2.11864236 |
| C  | 4.32848520  | -1.48982418 | -2.70693473 |
| H  | 3.09284326  | 0.28018498  | -2.53464427 |
| C  | 4.62136550  | -2.72162944 | -2.16006870 |
| H  | 4.84754747  | -1.12855727 | -3.58532736 |
| H  | 5.37981816  | -3.35891831 | -2.59970415 |
| N  | 1.28245014  | -1.76343860 | 1.15295227  |
| C  | 0.57912226  | -2.10126799 | 2.23544096  |
| C  | 2.20475704  | -2.65661401 | 0.68136899  |
| C  | 0.75267679  | -3.32194551 | 2.90285986  |
| H  | -0.14482141 | -1.37789951 | 2.58714562  |
| C  | 2.44533880  | -3.90570677 | 1.29558952  |
| C  | 1.68399107  | -4.22683096 | 2.43860228  |
| H  | 0.14983913  | -3.53566668 | 3.77604298  |
| H  | 1.83516253  | -5.17575788 | 2.93995629  |
| N  | 2.65641514  | 1.06260284  | 1.03550461  |
| C  | 2.94292893  | 2.27944254  | 0.48145820  |
| C  | 3.34110326  | 0.68877161  | 2.11771877  |
| C  | 4.32850688  | 1.49177031  | 2.70575823  |
| H  | 3.09437183  | -0.27928734 | 2.53366487  |
| C  | 4.62008550  | 2.72392589  | 2.15899016  |
| H  | 4.84822783  | 1.13080062  | 3.58388375  |
| H  | 5.37815200  | 3.36180856  | 2.59842990  |
| N  | 1.28068384  | 1.76347302  | -1.15295603 |
| C  | 2.20240835  | 2.65731635  | -0.68151087 |
| C  | 0.57673617  | 2.10086193  | -2.23515038 |
| C  | 2.44171574  | 3.90671923  | -1.29560004 |
| C  | 0.74900773  | 3.32181062  | -2.90242385 |
| H  | -0.14665475 | 1.37689307  | -2.58675899 |
| C  | 1.67969945  | 4.22739817  | -2.43830052 |
| H  | 0.14570723  | 3.53516544  | -3.77537564 |
| H  | 1.82991323  | 5.17654405  | -2.93952981 |
| C  | -1.60149454 | -2.21773969 | -2.65220124 |
| C  | -2.84109773 | -1.83009425 | -2.17673850 |
| C  | -2.90662817 | -0.92962367 | -1.10284048 |
| C  | -1.70021319 | -0.46326878 | -0.55547654 |
| C  | -0.44578202 | -1.70639386 | -2.05870721 |
| C  | -1.70028374 | 0.46218532  | 0.55600949  |
| C  | -2.90676541 | 0.92837966  | 1.10335578  |
| C  | -2.84136871 | 1.82870084  | 2.17739141  |
| H  | -3.76325601 | 2.19768179  | 2.60793037  |
| C  | -1.60183103 | 2.21631437  | 2.65303883  |
| C  | -0.44603841 | 1.70515899  | 2.05951779  |
| H  | -1.51078349 | -2.91095202 | -3.47863193 |
| H  | -3.76292630 | -2.19918124 | -2.60731120 |
| H  | 0.53558834  | -1.99063493 | -2.41426109 |
| H  | -1.51122333 | 2.90935635  | 3.47962316  |
| H  | 0.53528755  | 1.98940279  | 2.41519896  |
| N  | -0.48217967 | 0.84466049  | 1.03456163  |
| N  | -0.48204928 | -0.84566032 | -1.03393574 |
| C  | -4.17555731 | -0.46370155 | -0.54450533 |
| C  | -4.17562681 | 0.46242814  | 0.54489094  |
| N  | -5.30340307 | -0.91511978 | -1.07123112 |
| N  | -5.30354219 | 0.91379643  | 1.07151196  |
| C  | -6.46173566 | -0.47039764 | -0.54788643 |
| C  | -7.69896778 | -0.92450996 | -1.07514395 |
| C  | -6.46180694 | 0.46903695  | 0.54804651  |
| H  | -7.67833151 | -1.62959038 | -1.89648750 |
| C  | -7.69910902 | 0.92309736  | 1.07518507  |
| H  | -7.67858107 | 1.62817467  | 1.89653396  |
| C  | -8.87335762 | -0.46483290 | -0.53958130 |
| C  | -8.87342848 | 0.46338182  | 0.53950064  |
| C  | 3.92066846  | -3.15016980 | -1.01333890 |
| C  | 4.14720897  | -4.41215779 | -0.36957058 |
| C  | 3.43983575  | -4.77435751 | 0.73444106  |
| H  | 4.89678271  | -5.07645656 | -0.78317411 |
| H  | 3.61880792  | -5.73095902 | 1.21099511  |
| C  | 3.91854827  | 3.15204409  | 1.01261548  |
| C  | 4.14375829  | 4.41434632  | 0.36900282  |
| C  | 3.43566205  | 4.77614074  | -0.73467663 |
| H  | 4.89285156  | 5.07924355  | 0.78251480  |
| H  | 3.61356101  | 5.73301800  | -1.21107775 |
| H  | -9.82047779 | 0.80652890  | 0.93831062  |
| H  | -9.82035428 | -0.80801234 | -0.93848870 |

2. Coordinates of optimized structure of [Ru(phen)<sub>2</sub>dppz]<sup>2+</sup>  
(Complex 1) in water at B3LYP//SDD/6-311G\*\* level. E = -  
2149.50556892 Hartree.

|    |             |             |             |
|----|-------------|-------------|-------------|
| Ru | 1.14359096  | -0.00012764 | -0.00001521 |
| N  | 2.64491047  | -1.04895606 | -1.04220211 |
| C  | 2.94410865  | -2.26222906 | -0.48932608 |
| C  | 3.31880051  | -0.66719370 | -2.12722345 |
| C  | 4.31134883  | -1.46164790 | -2.71827305 |
| H  | 3.06059886  | 0.29641505  | -2.54456863 |
| C  | 4.61793229  | -2.68983090 | -2.17249588 |
| H  | 4.82128214  | -1.09426006 | -3.59881711 |
| H  | 5.37979134  | -3.32155689 | -2.61325052 |
| N  | 1.28020232  | -1.76307648 | 1.14679971  |
| C  | 0.58188033  | -2.10347058 | 2.23057740  |
| C  | 2.20964650  | -2.64712000 | 0.67448842  |
| C  | 0.76838315  | -3.32218356 | 2.89801527  |
| H  | -0.14599441 | -1.37721001 | 2.58642277  |
| C  | 2.46240870  | -3.89214272 | 1.28911007  |
| C  | 1.70628861  | -4.21896050 | 2.43340070  |
| H  | 0.16930444  | -3.53753952 | 3.77273763  |
| H  | 1.86864069  | -5.16569271 | 2.93445268  |
| N  | 2.64460866  | 1.04957669  | 1.04168367  |
| C  | 2.94267565  | 2.26318534  | 0.48892235  |
| C  | 3.31915220  | 0.66816061  | 2.12642291  |
| C  | 4.31127210  | 1.46327626  | 2.71729339  |
| H  | 3.06182832  | -0.29570942 | 2.54370458  |
| C  | 4.61672285  | 2.69179051  | 2.17162951  |
| H  | 4.82177572  | 1.09613148  | 3.59760714  |
| H  | 5.37822984  | 3.32403321  | 2.61224726  |
| N  | 1.27865483  | 1.76310253  | -1.14684614 |
| C  | 2.20755642  | 2.64774708  | -0.67459604 |
| C  | 0.57981950  | 2.10313927  | -2.23038153 |
| C  | 2.45918084  | 3.89309036  | -1.28903786 |
| C  | 0.76516005  | 3.32214887  | -2.89761529 |
| H  | -0.14751803 | 1.38632874  | -2.58621688 |
| C  | 1.70246703  | 4.21956635  | -2.43304127 |
| H  | 0.16568652  | 3.53721257  | -3.77213804 |
| H  | 1.86392515  | 5.16654621  | -2.93391904 |
| C  | -1.59822517 | -2.19499976 | -2.66883066 |
| C  | -2.83887760 | -1.81369306 | -2.19242901 |
| C  | -2.90759358 | -0.92333546 | -1.11200652 |
| C  | -1.70516016 | -0.45959521 | -0.55879128 |
| C  | -0.44532071 | -1.68694167 | -2.06937301 |
| C  | -1.70521117 | 0.45865917  | 0.55916612  |
| C  | -2.90769099 | 0.92228157  | 1.11237327  |
| C  | -2.83906651 | 1.81254692  | 2.19288045  |
| H  | -3.75479081 | 2.18257058  | 2.63342896  |
| C  | -1.59845852 | 2.19383580  | 2.66940370  |
| C  | -0.44549758 | 1.68589705  | 2.06994016  |
| H  | -1.50260995 | -2.87942915 | -3.50110796 |
| H  | -3.75456163 | -2.18378570 | -2.63300215 |
| H  | 0.53597143  | -1.96427042 | -2.42806403 |
| H  | -1.50291454 | 2.87815755  | 3.50177726  |
| H  | 0.53576111  | 1.96319327  | 2.42874658  |
| N  | -0.48714786 | 0.83519325  | 1.03741854  |
| N  | -0.48705620 | -0.83606856 | -1.03698212 |
| C  | -4.17690252 | -0.46112145 | -0.55002968 |
| C  | -4.17695181 | 0.46001917  | 0.55032983  |
| N  | -5.30600937 | -0.90600985 | -1.07718214 |
| N  | -5.30610711 | 0.90484144  | 1.07743518  |
| C  | -6.46569205 | -0.46345575 | -0.54881639 |
| C  | -7.70379769 | -0.91306548 | -1.07986007 |
| C  | -6.46574195 | 0.46221985  | 0.54901913  |
| H  | -7.68287571 | -1.61153569 | -1.90735954 |
| C  | -7.70389781 | 0.91174657  | 1.08001638  |
| H  | -7.68305452 | 1.61021843  | 1.90751631  |
| C  | -8.88101058 | -0.45971814 | -0.54286070 |
| C  | -8.88106069 | 0.45832123  | 0.54297274  |
| C  | 3.92553204  | -3.12429420 | -1.02344327 |
| C  | 4.16530822  | -4.38311558 | -0.37935228 |
| C  | 3.46402178  | -4.75125172 | 0.72681933  |
| H  | 4.92031843  | -5.03912042 | -0.79587464 |
| H  | 3.65148346  | -5.70471770 | 1.20581756  |
| C  | 3.92359825  | 3.12591986  | 1.02288885  |
| C  | 4.16219094  | 4.38526386  | 0.37899625  |
| C  | 3.46029012  | 4.75287655  | -0.72689107 |
| H  | 4.91684409  | 5.04154739  | 0.79541240  |
| H  | 3.64688988  | 5.70656564  | -1.20577742 |
| H  | -9.82701128 | 0.79930471  | 0.94636886  |
| H  | -9.82692365 | -0.80075698 | -0.94629822 |



3. Optimized coordinates of first triplet state/ dark state of [Ru(phen)<sub>2</sub>dppz]<sup>2+</sup> (Complex 1) in gas phase at TD/B3LYP/ SDD/6-311G\*\* level. E (dark state) = -2149.26149420 Hartree, E(S<sub>0</sub>)= -2149.3155709Hartree.

|    |             |             |             |
|----|-------------|-------------|-------------|
| Ru | 1.16312317  | -0.00000705 | 0.00000265  |
| N  | 2.66393408  | -1.06406420 | -1.03652386 |
| C  | 2.94956786  | -2.28115343 | -0.48273145 |
| C  | 3.34792179  | -0.69125755 | -2.11949317 |
| C  | 4.33396770  | -1.49541332 | -2.70820590 |
| H  | 3.10156691  | 0.27690923  | -2.53541330 |
| C  | 4.62474619  | -2.72781527 | -2.16152915 |
| H  | 4.85328702  | -1.13517836 | -3.58687096 |
| H  | 5.38174474  | -3.36658352 | -2.60151521 |
| N  | 1.28910058  | -1.76282049 | 1.15230805  |
| C  | 0.58403756  | -2.09937351 | 2.23397320  |
| C  | 2.20930653  | -2.65801408 | 0.68070431  |
| C  | 0.75467457  | -3.32075800 | 2.90095840  |
| H  | -0.13874120 | -1.37441013 | 2.58468377  |
| C  | 2.44692184  | -3.90779911 | 1.29453322  |
| C  | 1.68439243  | -4.22749415 | 2.43711883  |
| H  | 0.15074120  | -3.53355551 | 3.77360248  |
| H  | 1.83331343  | -5.17687195 | 2.93829048  |
| N  | 2.66391313  | 1.06411667  | 1.03648989  |
| C  | 2.94946491  | 2.28122675  | 0.48270132  |
| C  | 3.34795028  | 0.69133773  | 2.11943772  |
| C  | 4.33396699  | 1.49554231  | 2.70813232  |
| H  | 3.10165957  | -0.27684626 | 2.53535582  |
| C  | 4.62466323  | 2.72796526  | 2.16145923  |
| H  | 4.85332869  | 1.13532784  | 3.58678075  |
| H  | 5.38163790  | 3.36677123  | 2.60143170  |
| N  | 1.28898486  | 1.76281960  | -1.15230400 |
| C  | 2.20915374  | 2.65805809  | -0.68071284 |
| C  | 0.58388198  | 2.09934199  | -2.23395169 |
| C  | 2.44668727  | 3.90786112  | -1.29453646 |
| C  | 0.75443675  | 3.32074184  | -2.90093033 |
| H  | -0.13886140 | 1.37433938  | -2.58465380 |
| C  | 1.68411462  | 4.22752470  | -2.43710232 |
| H  | 0.15047374  | 3.53351316  | -3.77356023 |
| H  | 1.83297311  | 5.17691512  | -2.93826871 |
| C  | -1.61544907 | -2.21274299 | -2.64941521 |
| C  | -2.84790929 | -1.82291812 | -2.17128904 |
| C  | -2.90908291 | -0.91728982 | -1.09086906 |
| C  | -1.68712987 | -0.45651765 | -0.54880643 |
| C  | -0.44797503 | -1.70484454 | -2.05914209 |
| C  | -1.68713409 | 0.45644714  | 0.54884190  |
| C  | -2.90909168 | 0.91721012  | 1.09090207  |
| C  | -2.84792690 | 1.82283118  | 2.17132862  |
| H  | -3.77268056 | 2.18839836  | 2.59770456  |
| C  | -1.61547062 | 2.21265572  | 2.64946503  |
| C  | -0.44799157 | 1.70476847  | 2.05919186  |
| H  | -1.52888884 | -2.90583112 | -3.47633682 |
| H  | -3.77265944 | -2.18849211 | -2.59766675 |
| H  | 0.52860723  | -1.99615808 | -2.42297435 |
| H  | -1.52891713 | 2.90573481  | 3.47639493  |
| H  | 0.52858759  | 1.99608208  | 2.42303262  |
| N  | -0.47138832 | 0.84728631  | 1.03730995  |
| N  | -0.47138037 | -0.84735094 | -1.03726957 |
| C  | -4.15610479 | -0.45329248 | -0.53446019 |
| C  | -4.15610915 | 0.45320958  | 0.53448572  |
| N  | -5.32134075 | -0.92735551 | -1.08849830 |
| N  | -5.32134974 | 0.92726897  | 1.08851715  |
| C  | -6.46325641 | -0.46714076 | -0.54622842 |
| C  | -7.70648421 | -0.90940575 | -1.06000057 |
| C  | -6.46326096 | 0.46705183  | 0.54623969  |
| H  | -7.69032378 | -1.61428161 | -1.88249409 |
| C  | -7.70649305 | 0.90931432  | 1.06000337  |
| H  | -7.69033970 | 1.61418987  | 1.88249729  |
| C  | -8.95523732 | -0.44502898 | -0.51798064 |
| C  | -8.95524166 | 0.44493601  | 0.51797414  |
| C  | 3.92369425  | -3.15498921 | -1.01458483 |
| C  | 4.14762253  | -4.41753070 | -0.37093110 |
| C  | 3.43957765  | -4.77840909 | 0.73308833  |
| H  | 4.89572399  | -5.08339485 | -0.78469220 |
| H  | 3.61660237  | -5.73550973 | 1.20938170  |
| C  | 3.92355760  | 3.15511100  | 1.01453724  |
| C  | 4.14740103  | 4.41767061  | 0.37088996  |
| C  | 3.43930928  | 4.77852054  | -0.73310865 |
| H  | 4.89547664  | 5.08357146  | 0.78463870  |
| H  | 3.61627012  | 5.73563494  | -1.20939802 |
| H  | -9.88167185 | 0.80982393  | 0.94252767  |
| H  | -9.88166396 | -0.80991778 | -0.94254120 |

4. Optimized coordinates of first triplet state/ dark state of [Ru(phen)<sub>2</sub>dppz]<sup>2+</sup> (Complex 1) in water at TD/B3LYP/ SDD/6-311G\*\* level. E(T1) = -2149.43315568 Hartree, E(S<sub>0</sub>)= -2149.4908531 Hartree.

|    |             |             |             |
|----|-------------|-------------|-------------|
| Ru | 1.15363871  | -0.00000367 | -0.00000064 |
| N  | 2.65227725  | -1.05240883 | -1.04252979 |
| C  | 2.94861988  | -2.26625904 | -0.48952369 |
| C  | 3.32627639  | -0.67295267 | -2.12825510 |
| C  | 4.31639458  | -1.47019879 | -2.71966595 |
| H  | 3.07012085  | 0.29112131  | -2.54584460 |
| C  | 4.62018646  | -2.69898510 | -2.17361376 |
| H  | 4.82670179  | -1.10454930 | -3.60072835 |
| H  | 5.38010127  | -3.33285749 | -2.61465866 |
| N  | 1.28749250  | -1.76190703 | 1.14763487  |
| C  | 0.58844106  | -2.10000207 | 2.23164617  |
| C  | 2.21400030  | -2.64876462 | 0.67501846  |
| C  | 0.77168719  | -3.31917196 | 2.89920241  |
| H  | -0.13712820 | -1.38123128 | 2.58715269  |
| C  | 2.46354825  | -3.89435841 | 1.28981490  |
| C  | 1.70694137  | -4.21873586 | 2.43447712  |
| H  | 0.17227091  | -3.53279409 | 3.77413319  |
| H  | 1.86673667  | -5.16583567 | 2.93568510  |
| N  | 2.65226802  | 1.05242785  | 1.04251471  |
| C  | 2.94857577  | 2.26628803  | 0.48951161  |
| C  | 3.32628667  | 0.67298275  | 2.12823168  |
| C  | 4.31639191  | 1.47024923  | 2.71963667  |
| H  | 3.07015788  | -0.29109906 | 2.54581947  |
| C  | 4.62014912  | 2.69904530  | 2.17358735  |
| H  | 4.82671678  | 1.10460767  | 3.60069210  |
| H  | 5.38005360  | 3.33293337  | 2.61462749  |
| N  | 1.28744455  | 1.76190644  | -1.14763548 |
| C  | 2.21393575  | 2.64878314  | -0.67502145 |
| C  | 0.58837727  | 2.09999066  | -2.23163940 |
| C  | 2.46344839  | 3.89438660  | -1.28981249 |
| C  | 0.77158723  | 3.31916969  | -2.89918921 |
| H  | -0.13717529 | 1.38120306  | -2.58714576 |
| H  | 1.70682296  | 4.21875347  | -2.43446573 |
| H  | 0.17215843  | 3.53278248  | -3.77411367 |
| H  | 1.86659028  | 5.16586084  | -2.93566847 |
| C  | -1.61263187 | -2.19400908 | -2.66151964 |
| C  | -2.84616607 | -1.81060432 | -2.18444669 |
| C  | -2.91194100 | -0.91232232 | -1.09806719 |
| C  | -1.69209049 | -0.45356183 | -0.55118255 |
| C  | -0.44661485 | -1.68839560 | -2.06653774 |
| C  | -1.69209204 | 0.45353518  | 0.55119270  |
| C  | -2.91194409 | 0.91229231  | 1.09807662  |
| C  | -2.84617209 | 1.81057140  | 2.18445887  |
| H  | -3.76469485 | 2.17812349  | 2.62035197  |
| C  | -1.61263933 | 2.19397519  | 2.66153595  |
| C  | -0.44662047 | 1.68836482  | 2.06655445  |
| H  | -1.52062461 | -2.88001522 | -3.49306590 |
| H  | -3.76468754 | -2.17815856 | -2.62034066 |
| H  | 0.52950350  | -1.97390527 | -2.43370647 |
| H  | -1.52063420 | 2.87997765  | 3.49308547  |
| H  | 0.52949669  | 1.97387254  | 2.43372789  |
| N  | -0.47531172 | 0.83920289  | 1.03913540  |
| N  | -0.47530886 | -0.83922832 | -1.03912277 |
| C  | -4.15471863 | -0.44919873 | -0.53651937 |
| C  | -4.15472008 | 0.44916675  | 0.53652703  |
| N  | -5.32651631 | -0.92032191 | -1.09462672 |
| N  | -5.32651959 | 0.92028694  | 1.09463364  |
| C  | -6.47101166 | -0.46424800 | -0.55087432 |
| C  | -7.70951106 | -0.90224647 | -1.06840726 |
| C  | -6.47101319 | 0.46420964  | 0.55088069  |
| H  | -7.69709836 | -1.60042892 | -1.89632337 |
| C  | -7.70951434 | 0.90220384  | 1.06841348  |
| H  | -7.69710423 | 1.60038652  | 1.89632945  |
| C  | -8.95697900 | -0.44101461 | -0.52170196 |
| C  | -8.95698054 | 0.44096755  | 0.52170813  |
| C  | 3.92738236  | -3.13119926 | -1.02397341 |
| C  | 4.16410541  | -4.39068585 | -0.37958932 |
| C  | 3.46247653  | -4.75639327 | 0.72712006  |
| H  | 4.91705446  | -5.04872328 | -0.79634919 |
| H  | 3.64764342  | -5.71027639 | 1.20619400  |
| C  | 3.92732285  | 3.13124889  | 1.02395641  |
| C  | 4.16400978  | 4.39074486  | 0.37957784  |
| C  | 3.46236144  | 4.75644220  | -0.72712251 |
| H  | 4.91694713  | 5.04879771  | 0.79633451  |
| H  | 3.64750127  | 5.71033243  | -1.20619260 |
| H  | -9.88365176 | 0.80215044  | 0.94894575  |
| H  | -9.88364891 | -0.80220119 | -0.94893929 |

5. Optimized coordinates of first bright triplet state of [Ru(phen)<sub>2</sub>dppz]<sup>2+</sup> (Complex 1) in gas phase at TD/B3LYP/ SDD/6-311G\*\* level. E (<sup>3</sup>MLCT) = -2149.24889238 Hartree, E(S<sub>0</sub>) = -2149.3188521 Hartree.

|    |             |             |             |
|----|-------------|-------------|-------------|
| Ru | 1.18731566  | -0.00088080 | 0.00164724  |
| N  | 2.54760096  | -1.08328268 | -1.01209711 |
| C  | 2.78674688  | -2.35812371 | -0.46035898 |
| C  | 3.33029538  | -0.70241619 | -2.10395968 |
| C  | 4.25131150  | -1.53307005 | -2.66671962 |
| H  | 3.14543678  | 0.28755894  | -2.49418803 |
| C  | 4.46432674  | -2.84659437 | -2.14482366 |
| H  | 4.81908521  | -1.18950467 | -3.52169134 |
| H  | 5.18987771  | -3.50973290 | -2.59648870 |
| N  | 1.19633735  | -1.75371421 | 1.19402513  |
| C  | 0.48256735  | -2.05789588 | 2.27521479  |
| C  | 2.06278259  | -2.70468956 | 0.68378466  |
| C  | 0.57612879  | -3.29406205 | 2.92910133  |
| H  | -0.18766096 | -1.29153853 | 2.64571016  |
| C  | 2.21885903  | -3.98613570 | 1.30138512  |
| C  | 1.44769748  | -4.25722260 | 2.44140544  |
| H  | -0.02979945 | -3.47510426 | 3.80647732  |
| H  | 1.53916250  | -5.21765192 | 2.93589723  |
| N  | 2.69242021  | 1.01341546  | 1.05684850  |
| C  | 3.03563735  | 2.21300934  | 0.49761264  |
| C  | 3.33925748  | 0.60300321  | 2.14955175  |
| C  | 4.35042421  | 1.36511573  | 2.74894151  |
| H  | 3.04501179  | -0.35687431 | 2.55220081  |
| C  | 4.70098153  | 2.58251313  | 2.20130289  |
| H  | 4.84480990  | 0.98447763  | 3.63311079  |
| H  | 5.48142184  | 3.18613620  | 2.65040086  |
| N  | 1.39387915  | 1.75460893  | -1.17330627 |
| C  | 2.33891016  | 2.61152980  | -0.68441207 |
| C  | 0.73089960  | 2.10555183  | -2.27358500 |
| C  | 2.64663145  | 3.84402319  | -1.30096394 |
| C  | 0.97027287  | 3.31350652  | -2.94637762 |
| H  | -0.00963973 | 1.40572183  | -2.63923868 |
| C  | 1.92583271  | 4.18325635  | -2.46596331 |
| H  | 0.40066832  | 3.54260827  | -3.83767415 |
| H  | 2.12894442  | 5.11938588  | -2.97309691 |
| C  | -1.60419077 | -2.26714906 | -2.56531090 |
| C  | -2.84099219 | -1.84812748 | -2.11139905 |
| C  | -2.90499573 | -0.90220627 | -1.07620384 |
| C  | -1.69698546 | -0.42415856 | -0.54473148 |
| C  | -0.44385917 | -1.74409943 | -1.98996365 |
| C  | -1.69243385 | 0.54456408  | 0.52880350  |
| C  | -2.89668308 | 1.04139198  | 1.05305155  |
| C  | -2.82489271 | 1.98352959  | 2.09077396  |
| H  | -3.74529222 | 2.37514863  | 2.50468300  |
| C  | -1.58449036 | 2.38329776  | 2.55354405  |
| C  | -0.43136195 | 1.84190316  | 1.98192059  |
| H  | -1.51634804 | -2.99569889 | -3.36089285 |
| H  | -3.76447323 | -2.22754256 | -2.52969832 |
| H  | 0.53879611  | -2.04957814 | -2.32149081 |
| H  | -1.49106246 | 3.10770647  | 3.35231451  |
| H  | 0.55089359  | 2.13500276  | 2.32852993  |
| N  | -0.47642718 | 0.94008216  | 0.99492705  |
| C  | -0.48491921 | -0.84019228 | -1.00448156 |
| N  | -4.17156170 | -0.40387014 | -0.54164094 |
| C  | -4.16734043 | 0.56352151  | 0.51069337  |
| N  | -5.30149840 | -0.86565799 | -1.05455259 |
| N  | -5.29237014 | 1.04354727  | 1.01780350  |
| C  | -6.45737740 | -0.39248604 | -0.55151393 |
| C  | -7.69677207 | -0.85618525 | -1.06464118 |
| C  | -6.45277711 | 0.58773255  | 0.50963402  |
| H  | -7.68029364 | -1.59132760 | -1.85921414 |
| C  | -7.68748495 | 1.06979755  | 1.01729523  |
| H  | -7.66368981 | 1.80429564  | 1.81230686  |
| C  | -8.86849660 | -0.36821008 | -0.54849711 |
| C  | -8.86388360 | 0.59888053  | 0.49618976  |
| C  | 3.72426059  | -3.25853936 | -1.01400355 |
| C  | 3.87615923  | -4.53624140 | -0.38727459 |
| C  | 3.15122639  | -4.89080019 | 0.72170892  |
| H  | 4.59132578  | -5.23209837 | -0.81031489 |
| H  | 3.28676603  | -5.86607840 | 1.17422944  |
| C  | 4.03970895  | 3.04207144  | 1.04191550  |
| C  | 4.33444967  | 4.28876979  | 0.39640229  |
| C  | 3.66508262  | 4.67350906  | -0.72422099 |
| H  | 5.10574709  | 4.92133310  | 0.81942984  |
| H  | 3.89662988  | 5.61718882  | -1.20374197 |
| H  | -9.80925346 | 0.96290845  | 0.88013450  |
| H  | -9.81734067 | -0.71880223 | -0.93634607 |

6. Optimized coordinates of first bright triplet state of [Ru(phen)<sub>2</sub>dppz]<sup>2+</sup> (Complex 1) in water at TD/B3LYP/ SDD/6-311G\*\* level. E(<sup>3</sup>MLCT) = -2149.42424996 Hartree E(S<sub>0</sub>) = -2149.4941082 Hartree.

|    |             |             |             |
|----|-------------|-------------|-------------|
| Ru | 1.19044205  | -0.00820018 | 0.00138603  |
| N  | 2.55934494  | -1.06138516 | -1.01276186 |
| C  | 2.82323649  | -2.33395667 | -0.46606151 |
| C  | 3.32912845  | -0.66350054 | -2.10984689 |
| C  | 4.26248665  | -1.47749988 | -2.67582175 |
| H  | 3.12187614  | 0.32219164  | -2.49795932 |
| C  | 4.50379453  | -2.78880244 | -2.15728551 |
| H  | 4.81838283  | -1.12037689 | -3.53318595 |
| H  | 5.23976535  | -3.43878500 | -2.61128005 |
| N  | 1.22848266  | -1.75770695 | 1.19017774  |
| C  | 0.52518329  | -2.06791795 | 2.27361701  |
| C  | 2.10867426  | -2.69429211 | 0.67934659  |
| C  | 0.64162868  | -3.30411480 | 2.92869528  |
| H  | -0.15335720 | -1.31200388 | 2.64767622  |
| C  | 2.28910626  | -3.97086321 | 1.29771284  |
| C  | 1.52561491  | -4.25336752 | 2.44134718  |
| H  | 0.04093944  | -3.48999044 | 3.80836626  |
| H  | 1.63548868  | -5.21141421 | 2.93643523  |
| N  | 2.67186587  | 1.03494768  | 1.05499074  |
| C  | 2.99466133  | 2.23603171  | 0.48910370  |
| C  | 3.31279613  | 0.64516660  | 2.15714073  |
| C  | 4.30416846  | 1.43151645  | 2.75766285  |
| H  | 3.02897404  | -0.31224588 | 2.57112396  |
| C  | 4.63794513  | 2.64865497  | 2.20163915  |
| H  | 4.79249045  | 1.06815918  | 3.65149864  |
| H  | 5.40088947  | 3.27244304  | 2.65170787  |
| N  | 1.36023242  | 1.74362829  | -1.17721093 |
| C  | 2.29157199  | 2.61681846  | -0.69384531 |
| C  | 0.68431839  | 2.07772811  | -2.27354822 |
| C  | 2.57498339  | 3.85115453  | -1.31437866 |
| C  | 0.90050045  | 3.28829946  | -2.94917913 |
| H  | -0.04644711 | 1.36688590  | -2.63451722 |
| H  | 1.84337571  | 4.17447457  | -2.47652338 |
| H  | 0.32078220  | 3.50359749  | -3.83654016 |
| H  | 2.02889208  | 5.11274504  | -2.98514916 |
| C  | -1.58917989 | -2.26013782 | -2.58184712 |
| C  | -2.82715848 | -1.84924487 | -2.12572145 |
| C  | -2.89591153 | -0.91788553 | -1.07991884 |
| C  | -1.69304359 | -0.44375337 | -0.53886312 |
| C  | -0.43359838 | -1.74142195 | -1.99631359 |
| C  | -1.69028359 | 0.51526906  | 0.54432377  |
| C  | -2.89147213 | 1.00356788  | 1.07646745  |
| C  | -2.81876278 | 1.93247728  | 2.12424510  |
| H  | -3.73397582 | 2.32201910  | 2.54897618  |
| C  | -1.57902161 | 3.32765126  | 2.58917070  |
| C  | -0.42685064 | 1.79582692  | 2.00826155  |
| H  | -1.49582623 | -2.97593605 | -3.38720229 |
| H  | -3.74417755 | -2.22783287 | -2.55641629 |
| H  | 0.54969392  | -2.03647560 | -2.33329969 |
| H  | -1.48198924 | 3.04140985  | 3.39587244  |
| H  | 0.55378446  | 2.08608265  | 2.35815456  |
| N  | -0.47599601 | 0.90854451  | 1.00977203  |
| C  | -0.48148240 | -0.85229018 | -0.99888444 |
| C  | -4.16399321 | -0.42608342 | -0.54151361 |
| C  | -4.16177058 | 0.52967428  | 0.52746501  |
| N  | -5.29345961 | -0.87894981 | -1.06058391 |
| N  | -5.28894823 | 0.99966396  | 1.03612484  |
| C  | -6.45157910 | -0.41048595 | -0.55247357 |
| C  | -7.69071680 | -0.86601499 | -1.07585286 |
| C  | -6.44928004 | 0.54917002  | 0.51702777  |
| H  | -7.67179506 | -1.58952420 | -1.88148710 |
| H  | -7.68606004 | 1.02420383  | 1.02848767  |
| C  | -7.66346205 | 1.74743057  | 1.83428896  |
| C  | -8.86622786 | -0.38683615 | -0.55833419 |
| C  | -8.86390276 | 0.56365312  | 0.49953129  |
| C  | 3.77460507  | -3.21621153 | -1.02410375 |
| C  | 3.95060126  | -4.49047641 | -0.39728925 |
| C  | 3.23540585  | -4.85797178 | 0.71553358  |
| H  | 4.67685002  | -5.17331345 | -0.82314034 |
| H  | 3.38953431  | -5.82996501 | 1.16926635  |
| C  | 3.97864547  | 3.08620762  | 1.03344371  |
| C  | 4.25310861  | 4.33350839  | 0.38145835  |
| C  | 3.57876830  | 4.70031927  | -0.74212145 |
| H  | 5.01136854  | 4.98039013  | 0.80513499  |
| H  | 3.79073983  | 5.64506408  | -1.22760714 |
| H  | -9.80902385 | 0.92403839  | 0.88759512  |
| H  | -9.81310228 | -0.73216139 | -0.95569546 |

7. Coordinates of optimized structure of [Ru(phen)<sub>2</sub>dppzi]<sup>2+</sup> (Complex 2) in gas phase at B3LYP//SDD/ 6-311G\*\* level. E = -2296.9859821 Hartree.

|    |              |             |             |
|----|--------------|-------------|-------------|
| Ru | 1.68201771   | 0.00055700  | 0.00141433  |
| N  | 3.18429313   | -1.07359866 | -1.02345892 |
| C  | 3.46834495   | -2.28589411 | -0.45840820 |
| C  | 3.87013913   | -0.71086807 | -2.10870775 |
| C  | 4.85635218   | -1.52092911 | -2.68895630 |
| H  | 3.62502262   | 0.25370762  | -2.53360782 |
| C  | 5.14533920   | -2.74870293 | -2.13104984 |
| H  | 5.37701924   | -1.16894228 | -3.57016718 |
| H  | 5.90222851   | -3.39203099 | -2.56454055 |
| N  | 1.80625746   | -1.75195186 | 1.17015273  |
| C  | 1.09973474   | -2.07867446 | 2.25388596  |
| C  | 2.72624509   | -2.65199092 | 0.70731889  |
| C  | 1.26812194   | -3.29456017 | 2.93133766  |
| H  | 0.37735734   | -1.34999624 | 2.59762528  |
| C  | 2.96182143   | -3.89675379 | 1.33208341  |
| C  | 2.19739915   | -4.20615473 | 2.47622008  |
| H  | 0.66264316   | -3.49948520 | 3.80479369  |
| H  | 2.34442999   | -5.15159086 | 2.98533242  |
| N  | 3.18663761   | 1.07209624  | 1.02593388  |
| C  | 3.47479793   | 2.28249084  | 0.45885554  |
| C  | 3.87173810   | 0.70851515  | 2.11136006  |
| C  | 4.86121087   | 1.51588025  | 2.68984533  |
| H  | 3.62352243   | -0.25471570 | 2.53755423  |
| C  | 5.15444012   | 2.74169132  | 2.12982006  |
| H  | 5.38126160   | 1.16324808  | 3.57116456  |
| H  | 5.91414653   | 3.38277394  | 2.56170985  |
| N  | 1.81042256   | 1.75175910  | -1.16844934 |
| C  | 2.73374835   | 2.64927772  | -0.70735975 |
| C  | 1.10513295   | 2.07886821  | -2.25290764 |
| C  | 2.97406020   | 3.89183269  | -1.33469446 |
| C  | 1.27821899   | 3.29270897  | -2.93288399 |
| H  | 0.38022649   | 1.35211963  | -2.59540290 |
| C  | 2.21093804   | 4.20170088  | -2.47959496 |
| H  | 0.67380070   | 3.49787539  | -3.80702667 |
| H  | 2.36184787   | 5.14534729  | -2.99089709 |
| C  | -1.07221040  | -2.23656226 | -2.63275712 |
| C  | -2.31143775  | -1.84453432 | -2.16044185 |
| C  | -2.37780723  | -0.93506814 | -1.09368706 |
| C  | -1.17055791  | -0.46516031 | -0.55059483 |
| C  | 0.08416394   | -1.72138196 | -2.04357392 |
| C  | -1.17079924  | 0.46978803  | 0.55288024  |
| C  | -2.37820888  | 0.94101691  | 1.09633788  |
| C  | -2.30984575  | 1.85043885  | 2.16273408  |
| H  | -3.23147561  | 2.22338618  | 2.59026225  |
| C  | -1.07019063  | 2.24171261  | 2.63487956  |
| C  | 0.08540011   | 1.72533823  | 2.04563589  |
| H  | -0.98207374  | -2.93650416 | -3.45360263 |
| H  | -3.23374530  | -2.21645263 | -2.58761476 |
| H  | 1.06546464   | -2.00902015 | -2.39645698 |
| H  | -0.97909654  | 2.94177610  | 3.45550721  |
| H  | 1.06714796   | 2.01199318  | 2.39811764  |
| N  | 0.04728989   | 0.85612898  | 1.02809209  |
| N  | 0.04722466   | -0.85246940 | -1.02583827 |
| C  | -3.64595026  | -0.46478753 | -0.53984827 |
| C  | -3.64724397  | 0.47161208  | 0.54281318  |
| N  | -4.77144521  | -0.91970751 | -1.06257760 |
| N  | -4.77438924  | 0.92602724  | 1.06450925  |
| C  | -5.93829247  | -0.47771117 | -0.55121508 |
| C  | -7.15178644  | -0.95297795 | -1.09443307 |
| C  | -5.93946899  | 0.48170108  | 0.54994101  |
| H  | -7.13986217  | -1.66396403 | -1.90951402 |
| C  | -7.15563467  | 0.95560821  | 1.09128025  |
| H  | -7.13045986  | 1.66658789  | 1.90677164  |
| C  | -8.32708726  | -0.48303599 | -0.55588899 |
| C  | -8.31262675  | 0.46836928  | 0.53245712  |
| C  | -10.36687928 | -0.07971775 | -0.09521745 |
| H  | -11.44800475 | -0.07292397 | -0.08758635 |
| N  | -9.63170884  | -0.78641029 | -0.90283025 |
| N  | -9.64418408  | 0.69508256  | 0.79156840  |
| H  | -10.02836946 | 1.30900508  | 1.49339175  |
| C  | 4.44242982   | -3.16517495 | -0.98132626 |
| C  | 4.66432531   | -4.42231976 | -0.32656014 |
| C  | 3.95434845   | -4.77311761 | 0.77945432  |
| H  | 5.41227959   | -5.09246630 | -0.73362797 |
| H  | 4.12961429   | -5.72637899 | 1.26402636  |
| C  | 4.45246306   | 3.15895698  | 0.97981051  |
| C  | 4.67902989   | 4.41397666  | 0.32255573  |
| C  | 3.97014756   | 4.76537381  | -0.78398123 |
| H  | 5.42988183   | 5.08189234  | 0.72796000  |
| H  | 4.14923260   | 5.71687126  | -1.27062793 |

8. Coordinates of optimized structure of [Ru(phen)<sub>2</sub>dppzi]<sup>2+</sup> (Complex 2) in water at B3LYP//SDD/6-311G\*\* level. E = -2297.16548598 Hartree.

|    |              |             |             |
|----|--------------|-------------|-------------|
| Ru | 1.67176247   | 0.00031783  | 0.00011272  |
| N  | 3.17413503   | -1.05840353 | -1.03067319 |
| C  | 3.47281550   | -2.26631745 | -0.46601114 |
| C  | 3.84960865   | -0.68664310 | -2.11825115 |
| C  | 4.84321756   | -1.48639534 | -2.70029374 |
| H  | 3.59180072   | 0.27297693  | -2.54492454 |
| C  | 5.14934309   | -2.70930556 | -2.14246650 |
| H  | 5.35446338   | -1.12734802 | -3.58351372 |
| H  | 5.91198288   | -3.34491339 | -2.57623788 |
| N  | 1.80631171   | -1.75218261 | 1.16273004  |
| C  | 1.10582003   | -2.08274459 | 2.24815126  |
| C  | 2.73657138   | -2.64047676 | 0.70024131  |
| C  | 1.29105629   | -3.29535886 | 2.92697413  |
| H  | 0.37734445   | -1.36312645 | 2.59578493  |
| C  | 2.98847971   | -3.87977974 | 1.32681569  |
| C  | 2.23008705   | -4.19621715 | 2.47251831  |
| H  | 0.69021985   | -3.50292439 | 3.80238738  |
| H  | 2.39143455   | -5.13830300 | 2.98262229  |
| N  | 3.17266227   | 1.05911183  | 1.03302796  |
| C  | 3.47236929   | 2.26685522  | 0.46853724  |
| C  | 3.84667446   | 0.68736519  | 2.12151539  |
| C  | 4.83975516   | 1.48695895  | 2.70467556  |
| H  | 3.58810563   | -0.27214270 | 2.54798487  |
| C  | 5.14688741   | 2.70970539  | 2.14704118  |
| H  | 5.34981403   | 1.12790969  | 3.58858273  |
| H  | 5.90915136   | 3.34518783  | 2.58166051  |
| N  | 1.80790425   | 1.75279471  | -1.16231547 |
| C  | 2.73773091   | 2.64097756  | -0.69873718 |
| C  | 1.10879195   | 2.08338148  | -2.24862581 |
| C  | 2.99069307   | 3.88013872  | -1.32516893 |
| C  | 1.29512052   | 3.29588398  | -2.92735177 |
| H  | 0.38059823   | 1.36387465  | -2.59709631 |
| C  | 2.23380613   | 4.19658246  | -2.47186552 |
| H  | 0.69541738   | 3.50346585  | -3.80353856 |
| H  | 2.39603289   | 5.13854506  | -2.98191736 |
| C  | -1.06642977  | -2.21651777 | -2.65296594 |
| C  | -2.30759769  | -1.83171654 | -2.18038425 |
| C  | -2.37862799  | -0.93275857 | -1.10725397 |
| C  | -1.17626020  | -0.46439826 | -0.55719578 |
| C  | 0.08597586   | -1.70360397 | -2.05688115 |
| C  | -1.17737801  | 0.46350172  | 0.55337883  |
| C  | -2.38076042  | 0.93115398  | 1.10213525  |
| C  | -2.31164275  | 1.83045580  | 2.17509788  |
| H  | -3.22773764  | 2.20377259  | 2.61219821  |
| C  | -1.07132632  | 2.21648261  | 2.64894653  |
| C  | 0.08204504   | 1.70420482  | 2.05427762  |
| H  | -0.97025004  | -2.90760424 | -3.47973112 |
| H  | -3.22287752  | -2.20571147 | -2.61862123 |
| H  | 1.06772336   | -1.98350244 | -2.41225382 |
| H  | -0.97656861  | 2.90793017  | 3.47556702  |
| H  | 1.06320151   | 1.98496058  | 2.41062937  |
| N  | 0.04025224   | 0.84469149  | 1.02891007  |
| N  | 0.04227561   | -0.84453092 | -1.03129265 |
| C  | -3.64903293  | -0.46683889 | -0.54989900 |
| C  | -3.65027335  | 0.46411299  | 0.54375205  |
| N  | -4.77565513  | -0.91540845 | -1.07260810 |
| N  | -4.77772379  | 0.91181612  | 1.06599350  |
| C  | -5.94454628  | -0.47511462 | -0.55508132 |
| C  | -7.15968695  | -0.94567779 | -1.10118164 |
| C  | -5.94517600  | 0.46985781  | 0.54719232  |
| H  | -7.14169445  | -1.65036540 | -1.92241401 |
| C  | -7.16082225  | 0.93993022  | 1.09399562  |
| H  | -7.14169164  | 1.64414169  | 1.91542349  |
| C  | -8.33700991  | -0.48063417 | -0.55864730 |
| C  | -8.31934751  | 0.45850581  | 0.53375703  |
| C  | -10.37821474 | -0.06910503 | -0.07886085 |
| H  | -11.45847093 | -0.05476017 | -0.06129533 |
| N  | -9.65040049  | -0.77733513 | -0.90253800 |
| N  | -9.65097549  | 0.68830037  | 0.80201907  |
| H  | -10.02861701 | 1.29829258  | 1.51163819  |
| C  | 4.45538509   | -3.13313290 | -0.99041890 |
| C  | 4.69459947   | -4.38586066 | -0.33396556 |
| C  | 3.99149146   | -4.74367386 | 0.77439522  |
| H  | 5.45065632   | -5.04526159 | -0.74286372 |
| H  | 4.17864105   | -5.69252493 | 1.26257331  |
| C  | 4.45448976   | 3.13351917  | 0.99404784  |
| C  | 4.69485017   | 4.38607306  | 0.33767600  |
| C  | 3.99321539   | 4.74387932  | -0.77162133 |
| H  | 5.45057774   | 5.04534180  | 0.74739461  |
| H  | 4.18120669   | 5.69259928  | -1.25973304 |

9. Optimized coordinates of first triplet state/ dark state of [Ru(phen)<sub>2</sub>dppzi]<sup>2+</sup> (Complex 2) in gas phase at TD/B3LYP/SDD/6-311G\*\* level. E (DS) = -2296.92778812 Hartree, E(S<sub>0</sub>) = -2296.9766116 Hartree.

|    |              |             |             |
|----|--------------|-------------|-------------|
| Ru | 1.69382264   | 0.00093604  | 0.00130433  |
| N  | 3.19591955   | -1.07408863 | -1.02169861 |
| C  | 3.47820814   | -2.28669713 | -0.45654957 |
| C  | 3.88290665   | -0.71227623 | -2.10649010 |
| C  | 4.86872689   | -1.52342401 | -2.68584818 |
| H  | 3.63892285   | 0.25247124  | -2.53167339 |
| C  | 5.15601811   | -2.75149239 | -2.12767461 |
| H  | 5.39042399   | -1.17205754 | -3.56669460 |
| H  | 5.91255720   | -3.39565852 | -2.56051633 |
| N  | 1.81507717   | -1.75060931 | 1.16980444  |
| C  | 1.10565088   | -2.07660808 | 2.25176201  |
| C  | 2.73441458   | -2.65190784 | 0.70834672  |
| C  | 1.27137102   | -3.29293539 | 2.92919266  |
| H  | 0.38322144   | -1.34703229 | 2.59338047  |
| C  | 2.96735133   | -3.89703309 | 1.33317066  |
| C  | 2.20051986   | -4.20556518 | 2.47590837  |
| H  | 0.66381469   | -3.49735474 | 3.80131328  |
| H  | 2.34551967   | -5.15122811 | 2.98517777  |
| N  | 3.19324357   | 1.07595538  | 1.02867622  |
| C  | 3.47938595   | 2.28712095  | 0.46231065  |
| C  | 3.87689554   | 0.71441327  | 2.11565469  |
| C  | 4.86298959   | 1.52445203  | 2.69612058  |
| H  | 3.63012857   | -0.24939504 | 2.54140174  |
| C  | 5.15417167   | 2.75104237  | 2.13669549  |
| H  | 5.38206918   | 1.17328083  | 3.57859282  |
| H  | 5.91121547   | 3.39419661  | 2.57016270  |
| N  | 1.81977454   | 1.75146645  | -1.16781065 |
| C  | 2.73953287   | 2.65179855  | -0.70528976 |
| C  | 1.11417160   | 2.07671659  | -2.25253578 |
| C  | 2.97695050   | 3.89516157  | -1.33192500 |
| C  | 1.28448970   | 3.29137443  | -2.93186536 |
| H  | 0.39147276   | 1.34782158  | -2.59506723 |
| C  | 2.21423144   | 4.20294133  | -2.47764019 |
| H  | 0.68017692   | 3.49510934  | -3.80640515 |
| H  | 2.36298524   | 5.14711101  | -2.98860068 |
| C  | -1.07679394  | -2.23558470 | -2.63374384 |
| C  | -2.31010574  | -1.84244838 | -2.15999912 |
| C  | -2.37426489  | -0.92829518 | -1.08786497 |
| C  | -1.15404614  | -0.46211534 | -0.54835866 |
| C  | 0.08954700   | -1.72213116 | -2.04613917 |
| C  | -1.15721148  | 0.46081766  | 0.54113801  |
| C  | -2.38031462  | 0.92569179  | 1.07794072  |
| C  | -2.31974792  | 1.84042521  | 2.14957068  |
| H  | -3.24579437  | 2.20849378  | 2.57106158  |
| C  | -1.08840152  | 2.23643854  | 2.62641083  |
| C  | 0.07982404   | 1.72429495  | 2.04200484  |
| H  | -0.98903354  | -2.93544009 | -3.45482285 |
| H  | -3.23414484  | -2.21234758 | -2.58447037 |
| H  | 1.06701482   | -2.01563086 | -2.40574465 |
| H  | -1.00356466  | 2.93706410  | 3.44711613  |
| H  | 1.05605494   | 2.01948098  | 2.40371757  |
| N  | 0.05734154   | 0.85751444  | 1.02795951  |
| N  | 0.06275732   | -0.85639634 | -1.03161443 |
| C  | -3.62475076  | -0.46097845 | -0.53716579 |
| C  | -3.62922009  | 0.45669285  | 0.52543166  |
| N  | -4.78248654  | -0.93650759 | -1.08248287 |
| N  | -4.79163712  | 0.93041783  | 1.06920343  |
| C  | -5.93363068  | -0.47950603 | -0.55296223 |
| C  | -7.15867310  | -0.94859484 | -1.08705435 |
| C  | -5.93570479  | 0.47251723  | 0.53961981  |
| H  | -7.15151550  | -1.66041214 | -1.90233974 |
| C  | -7.17192507  | 0.94296089  | 1.07652358  |
| H  | -7.13991149  | 1.65479756  | 1.89182279  |
| C  | -8.38592108  | -0.46778833 | -0.53548273 |
| C  | -8.36446178  | 0.45619001  | 0.51977991  |
| C  | -10.42706272 | -0.06714201 | -0.07658813 |
| H  | -11.50606979 | -0.06693309 | -0.07561949 |
| N  | -9.66126074  | -0.77980882 | -0.89086567 |
| N  | -9.69437326  | 0.69297550  | 0.79116853  |
| H  | -10.06864393 | 1.31113027  | 1.49693237  |
| C  | 4.45168757   | -3.16712251 | -0.97857644 |
| C  | 4.67126885   | -4.42453782 | -0.32350283 |
| C  | 3.95954061   | -4.77450767 | 0.78164612  |
| H  | 5.41884102   | -5.09561129 | -0.72974754 |
| H  | 4.13303934   | -5.72805135 | 1.26630882  |
| C  | 4.45347826   | 3.16633497  | 0.98525123  |
| C  | 4.67760364   | 4.42201133  | 0.32836761  |
| C  | 3.96962700   | 4.77145281  | -0.77936834 |
| H  | 5.42578393   | 5.09207782  | 0.73516416  |
| H  | 4.14678577   | 5.72355366  | -1.26555030 |

10. Optimized coordinates of first triplet state/ dark state of [Ru(phen)<sub>2</sub>dppzi]<sup>2+</sup> (Complex 2) in water at TD/B3LYP/SDD/6-311G\*\* level. E(DS) = -2297.10340980 Hartree, E(S<sub>0</sub>) = -2297.1545113 Hartree.

|    |              |             |             |
|----|--------------|-------------|-------------|
| Ru | 1.68364071   | 0.00057736  | 0.00003421  |
| N  | 3.18485418   | -1.06043192 | -1.02938366 |
| C  | 3.48102752   | -2.26882424 | -0.46434404 |
| C  | 3.86108973   | -0.69067231 | -2.11714511 |
| C  | 4.85313522   | -1.49265367 | -2.69879122 |
| H  | 3.60516218   | 0.26931655  | -2.54418569 |
| C  | 5.15678537   | -2.71596266 | -2.14044621 |
| H  | 5.36517303   | -1.13498481 | -3.58212005 |
| H  | 5.91819315   | -3.35328313 | -2.57386418 |
| N  | 1.81550917   | -1.75046732 | 1.16388106  |
| C  | 1.11372274   | -2.07922104 | 2.24896363  |
| C  | 2.74393749   | -2.64100780 | 0.70198316  |
| C  | 1.29607678   | -3.29205150 | 2.92823263  |
| H  | 0.38665820   | -1.35763341 | 2.59551776  |
| C  | 2.99296117   | -3.88059235 | 1.32901870  |
| C  | 2.23344480   | -4.19506372 | 2.47452451  |
| H  | 0.69432937   | -3.49813152 | 3.80338135  |
| H  | 2.39255824   | -5.13733942 | 2.98499116  |
| N  | 3.18007897   | 1.06293256  | 1.03510358  |
| C  | 3.47769319   | 2.27133857  | 0.47083617  |
| C  | 3.85277905   | 0.69367271  | 2.12522230  |
| C  | 4.84252791   | 1.49615444  | 2.71007202  |
| H  | 3.59581930   | -0.26637150 | 2.55151837  |
| C  | 5.14754738   | 2.71950352  | 2.15256184  |
| H  | 5.35173367   | 1.13882769  | 3.59517841  |
| H  | 5.90722145   | 3.35721867  | 2.58844239  |
| N  | 1.81819465   | 1.75183481  | -1.16317538 |
| C  | 2.74449281   | 2.64295408  | -0.69811525 |
| C  | 1.11976167   | 2.08019684  | -2.25054801 |
| C  | 2.99496148   | 3.88262884  | -1.32439973 |
| C  | 1.30367382   | 3.29314232  | -2.92919368 |
| H  | 0.39425759   | 1.35819028  | -2.59953550 |
| C  | 2.23910576   | 4.19663610  | -2.47245329 |
| H  | 0.70470024   | 3.49889337  | -3.80632143 |
| H  | 2.39947336   | 5.13894765  | -2.98246096 |
| C  | -1.07364251  | -2.21669368 | -2.64957933 |
| C  | -2.30886091  | -1.83037871 | -2.17677264 |
| C  | -2.37748107  | -0.92474866 | -1.09843799 |
| C  | -1.16074313  | -0.46082612 | -0.55359831 |
| C  | 0.08987557   | -1.70589443 | -2.05669565 |
| C  | -1.16379293  | 0.45664660  | 0.54272042  |
| C  | -2.38390685  | 0.91828160  | 1.08388789  |
| C  | -2.32059539  | 1.82498545  | 2.16227973  |
| H  | -3.24041261  | 2.19476939  | 2.59370764  |
| C  | -1.08790289  | 2.21449691  | 2.63853158  |
| C  | 0.07855386   | 1.70570776  | 2.04949853  |
| H  | -0.98019307  | -2.90894480 | -3.47581743 |
| H  | -3.22630130  | -2.20231264 | -2.61148782 |
| H  | 1.06737363   | -1.99288476 | -2.41894529 |
| H  | -0.99838224  | 2.90754339  | 3.46452540  |
| H  | 1.05429110   | 1.99509479  | 2.41460220  |
| N  | 0.05117575   | 0.84755649  | 1.02866358  |
| N  | 0.05704905   | -0.84870372 | -1.03548015 |
| C  | -3.62451842  | -0.45809187 | -0.54142925 |
| C  | -3.62708866  | 0.44903850  | 0.52441576  |
| N  | -4.79118587  | -0.93041425 | -1.09116169 |
| N  | -4.79872874  | 0.91995246  | 1.07364314  |
| C  | -5.94126253  | -0.47877452 | -0.56008418 |
| C  | -7.16611021  | -0.94266134 | -1.09721779 |
| C  | -5.94174434  | 0.46710856  | 0.54347893  |
| H  | -7.15356172  | -1.64730967 | -1.91870158 |
| C  | -7.17427637  | 0.93180065  | 1.08443427  |
| H  | -7.15511290  | 1.63630212  | 1.90578889  |
| C  | -8.39650081  | -0.46662863 | -0.54056279 |
| C  | -8.37354463  | 0.44475232  | 0.51919043  |
| C  | -10.43831779 | -0.06068031 | -0.06538744 |
| H  | -11.51638260 | -0.04990663 | -0.05102151 |
| N  | -9.68175662  | -0.77124081 | -0.89263376 |
| N  | -9.69524619  | 0.68536653  | 0.80098315  |
| H  | -10.05904254 | 1.30003462  | 1.51598850  |
| C  | 4.46182136   | -3.13785206 | -0.98831620 |
| C  | 4.69831068   | -4.39086230 | -0.33132111 |
| C  | 3.99428769   | -4.74680541 | 0.77705119  |
| H  | 5.45304857   | -5.05200472 | -0.73987518 |
| H  | 4.17937559   | -5.69589843 | 1.26556213  |
| C  | 4.45631507   | 3.14089988  | 0.99800567  |
| C  | 4.69447151   | 4.39391250  | 0.34161071  |
| C  | 3.99399919   | 4.74939191  | -0.76915843 |
| H  | 5.44755074   | 5.05544165  | 0.75259001  |
| H  | 4.18025213   | 5.69851125  | -1.25717631 |

**11. Optimized coordinates of first bright triplet state of [Ru(phen)<sub>2</sub>dppzi]<sup>2+</sup> (Complex 2) in gas phase at TD/B3LYP/SDD/6-311G\*\* level. E (<sup>3</sup>MLCT)= -2296.90578966 Hartree, E(S<sub>0</sub>)= -2296.9753792 Hartree.**

|    |              |             |             |
|----|--------------|-------------|-------------|
| Ru | 1.71394326   | -0.00102058 | -0.00004924 |
| N  | 3.21563906   | -1.03171004 | -1.04507513 |
| C  | 3.55186135   | -2.22817325 | -0.47511472 |
| C  | 3.86534024   | -0.63424740 | -2.14079373 |
| C  | 4.87280156   | -1.40697383 | -2.73267408 |
| H  | 3.57596510   | 0.32354740  | -2.55189649 |
| C  | 5.21634524   | -2.62149614 | -2.17411321 |
| H  | 5.36970125   | -1.03694905 | -3.61991986 |
| H  | 5.99368060   | -3.23328445 | -2.61750283 |
| N  | 1.91065211   | -1.74664244 | 1.18974046  |
| C  | 1.24329683   | -2.08496510 | 2.29123308  |
| C  | 2.85159957   | -2.61280426 | 0.70936832  |
| C  | 1.47455271   | -3.28885790 | 2.97400659  |
| H  | 0.50575712   | -1.37797854 | 2.64896681  |
| C  | 3.15122645   | -3.84198793 | 1.33638310  |
| C  | 2.42624344   | -4.16775632 | 2.50254009  |
| H  | 0.90156952   | -3.50782963 | 3.86566455  |
| H  | 2.62284462   | -5.10103777 | 3.01741627  |
| N  | 3.08235273   | 1.08471690  | 1.00332221  |
| C  | 3.32680722   | 2.35248785  | 0.43842245  |
| C  | 3.86525298   | 0.71039441  | 2.09565400  |
| C  | 4.79255363   | 1.54133069  | 2.64861002  |
| H  | 3.67598615   | -0.27477011 | 2.49614677  |
| C  | 5.01113789   | 2.84808252  | 2.11356333  |
| H  | 5.36037736   | 1.20270491  | 3.50549729  |
| H  | 5.74152505   | 3.51163335  | 2.55683503  |
| N  | 1.73017542   | 1.74072445  | -1.20769908 |
| C  | 2.60247760   | 2.69186601  | -0.70777941 |
| C  | 1.01523481   | 2.03834174  | -2.29001703 |
| C  | 2.76393839   | 3.96635316  | -1.33785680 |
| C  | 1.11394288   | 3.26762099  | -2.95512922 |
| H  | 0.34005806   | 1.27196684  | -2.65124075 |
| C  | 1.99203229   | 4.23070467  | -2.47858159 |
| H  | 0.50706643   | 3.44368305  | -3.83323269 |
| H  | 2.08777794   | 5.18587894  | -2.98236213 |
| C  | -1.06419153  | -2.39298520 | -2.53231317 |
| C  | -2.30286985  | -1.98276537 | -2.07462267 |
| C  | -2.37233338  | -1.03114437 | -1.04478870 |
| C  | -1.16539064  | -0.53635186 | -0.52393993 |
| C  | 0.09159638   | -1.85329182 | -1.96423770 |
| C  | -1.16666581  | 0.44122336  | 0.54117661  |
| C  | -2.37384526  | 0.92957180  | 1.06775453  |
| C  | -2.30319402  | 1.88366214  | 2.09529273  |
| H  | -3.22493260  | 2.27115069  | 2.50983761  |
| C  | -1.06470612  | 2.30025955  | 2.54657293  |
| C  | 0.09354215   | 1.76718225  | 1.97640567  |
| H  | -0.97388597  | -3.12482145 | -3.32468124 |
| H  | -3.22507104  | -2.37288897 | -2.48597818 |
| H  | 1.07272438   | -2.15471035 | -2.30669214 |
| H  | -0.97362506  | 3.03489726  | 3.33618403  |
| H  | 1.07769036   | 2.07039651  | 2.30537053  |
| N  | 0.04704626   | 0.85544758  | 0.99836090  |
| N  | 0.04901040   | -0.94250284 | -0.98530625 |
| C  | -3.64020737  | -0.54300754 | -0.50856035 |
| C  | -3.64225543  | 0.43412402  | 0.53702887  |
| N  | -4.76472145  | -1.02108715 | -1.01272278 |
| N  | -4.76977436  | 0.90456821  | 1.04332712  |
| C  | -5.93183052  | -0.56279505 | -0.51791780 |
| C  | -7.14447125  | -1.06046586 | -1.04234612 |
| C  | -5.93412546  | 0.43804978  | 0.54764177  |
| H  | -7.13189869  | -1.80102708 | -1.83061450 |
| C  | -7.15066681  | 0.92867861  | 1.07210839  |
| H  | -7.12686494  | 1.66989949  | 1.86019679  |
| C  | -8.32015943  | -0.57307219 | -0.52059975 |
| C  | -8.30693137  | 0.41842400  | 0.53227561  |
| C  | -10.35997558 | -0.15674930 | -0.07379912 |
| H  | -11.44111926 | -0.15169766 | -0.06615110 |
| N  | -9.62372053  | -0.89132959 | -0.85531036 |
| N  | -9.63819464  | 0.65190047  | 0.78322960  |
| H  | -10.02350426 | 1.29122941  | 1.46157543  |
| C  | 4.55180247   | -3.06741771 | -1.01137342 |
| C  | 4.83879512   | -4.31021857 | -0.35496172 |
| C  | 4.16578814   | -4.68186493 | 0.76790125  |
| H  | 5.60691045   | -4.95074008 | -0.77176042 |
| H  | 4.39123483   | -5.62294929 | 1.25536288  |
| C  | 4.27082359   | 3.25312992  | 0.98127670  |
| C  | 4.42814132   | 4.52419921  | 0.34152766  |
| C  | 3.70280223   | 4.87172533  | -0.76868157 |
| H  | 5.14811683   | 5.22011856  | 0.75626891  |
| H  | 3.84245740   | 5.84176419  | -1.23113991 |

**12. Optimized coordinates of first bright triplet state of [Ru(phen)<sub>2</sub>dppzi]<sup>2+</sup> (Complex 2) in water at TD/B3LYP/SDD/6-311G\*\* level. E(<sup>3</sup>MLCT) = -2297.08440107 Hartree E(S<sub>0</sub>)= -2297.1540739 Hartree.**

|    |              |             |             |
|----|--------------|-------------|-------------|
| Ru | 1.71732411   | 0.00678793  | -0.00054733 |
| N  | 3.19810533   | -1.04947854 | -1.04281634 |
| C  | 3.51721076   | -2.24596514 | -0.46534306 |
| C  | 3.84164654   | -0.67122305 | -2.14742155 |
| C  | 4.83240278   | -1.46517182 | -2.73891336 |
| H  | 3.56049859   | 0.28301091  | -2.57047901 |
| C  | 5.16262836   | -2.67777959 | -2.17098974 |
| H  | 5.32316408   | -1.11126440 | -3.63518781 |
| H  | 5.92510770   | -3.30721400 | -2.61392566 |
| N  | 1.88109980   | -1.73473544 | 1.19369759  |
| C  | 1.20221473   | -2.05737848 | 2.29154390  |
| C  | 2.81116257   | -2.61440191 | 0.71985432  |
| C  | 1.41397898   | -3.26253871 | 2.97821061  |
| H  | 0.47268356   | -1.34126742 | 2.64445380  |
| C  | 3.09056197   | -3.84377542 | 1.35196638  |
| C  | 2.35568625   | -4.15509330 | 2.51533347  |
| H  | 0.83189846   | -3.46872564 | 3.86619444  |
| H  | 2.53768748   | -5.08932830 | 3.03263488  |
| N  | 3.08862443   | 1.06558441  | 1.00551243  |
| C  | 3.35717621   | 2.33183006  | 0.44651178  |
| C  | 3.85727098   | 0.67540911  | 2.10583995  |
| C  | 4.79383575   | 1.49130294  | 2.66393286  |
| H  | 3.64658494   | -0.30578828 | 2.50347588  |
| C  | 5.03968718   | 2.79667074  | 2.13296948  |
| H  | 5.34866195   | 1.14024928  | 3.52450008  |
| H  | 5.77809501   | 3.44829959  | 2.58063821  |
| N  | 1.76100084   | 1.74540259  | -1.20493079 |
| C  | 2.64416483   | 2.68376558  | -0.70252212 |
| C  | 1.05882063   | 2.04784038  | -2.29127856 |
| C  | 2.82913818   | 3.95374055  | -1.33296311 |
| C  | 1.17948853   | 3.27739131  | -2.95784354 |
| H  | 0.37789626   | 1.29059264  | -2.65821695 |
| C  | 2.06683826   | 4.22811086  | -2.47924028 |
| H  | 0.57957562   | 3.45710701  | -3.83932530 |
| H  | 2.18020055   | 5.18100739  | -2.98342105 |
| C  | -1.05295756  | -2.34471023 | -2.57066467 |
| C  | -2.29237559  | -1.94112315 | -2.11186321 |
| C  | -2.36545137  | -1.00235463 | -1.07284947 |
| C  | -1.16323147  | -0.51327624 | -0.54312830 |
| C  | 0.09992520   | -1.81147183 | -1.99265536 |
| C  | -1.16492386  | 0.45560581  | 0.53167111  |
| C  | -2.36757614  | 0.93843989  | 1.06639046  |
| C  | -2.29605099  | 1.87900254  | 2.10378205  |
| H  | -3.21251604  | 2.26457400  | 2.52950714  |
| C  | -1.05738993  | 2.29003079  | 2.55829517  |
| C  | 0.09739693   | 1.76245921  | 1.97947642  |
| H  | -0.95683231  | -3.06639302 | -3.37046155 |
| H  | -3.20803323  | -2.33166160 | -2.53480589 |
| H  | 1.08041278   | -2.10820690 | -2.33746076 |
| H  | -0.96308188  | 3.01287399  | 3.35727974  |
| H  | 1.08132104   | 2.05713584  | 2.31490136  |
| N  | 0.04722411   | 0.86442493  | 0.98997987  |
| N  | 0.05074875   | -0.91462805 | -1.00264561 |
| C  | -3.63565185  | -0.51962220 | -0.53087218 |
| C  | -3.63695597  | 0.44663493  | 0.53043807  |
| N  | -4.76151683  | -0.98897858 | -1.03635866 |
| N  | -4.76375670  | 0.90739891  | 1.04220470  |
| C  | -5.93002555  | -0.53587032 | -0.53039254 |
| C  | -7.14486776  | -1.02752483 | -1.05792667 |
| C  | -5.93080418  | 0.44432625  | 0.54216167  |
| H  | -7.12685521  | -1.75767368 | -1.85650984 |
| C  | -7.14628300  | 0.92675369  | 1.07789804  |
| H  | -7.12737803  | 1.65674368  | 1.87642422  |
| C  | -8.32188502  | -0.54970880 | -0.52635808 |
| C  | -8.30442932  | 0.42350549  | 0.53652878  |
| C  | -10.36261983 | -0.13089900 | -0.05292868 |
| H  | -11.44283379 | -0.11986528 | -0.03233663 |
| N  | -9.63475324  | -0.86158993 | -0.85671691 |
| N  | -9.63557315  | 0.65655564  | 0.80153027  |
| H  | -10.01345392 | 1.28739801  | 1.49266153  |
| C  | 4.50032457   | -3.10322296 | -1.00003749 |
| C  | 4.77097455   | -4.34506380 | -0.33612164 |
| C  | 4.09369768   | -4.70020242 | 0.78942698  |
| H  | 5.52864048   | -4.99742531 | -0.75239302 |
| H  | 4.30284720   | -5.64092443 | 1.28383639  |
| C  | 4.31192997   | 3.21586011  | 0.99603614  |
| C  | 4.49265169   | 4.48351586  | 0.35688553  |
| C  | 3.77882292   | 4.84297827  | -0.75917791 |
| H  | 5.22155644   | 5.16760575  | 0.77616329  |
| H  | 3.93652279   | 5.81000074  | -1.22223096 |

**13.** Coordinates of optimized structure of [Ru(phen)<sub>2</sub>dppz-idzo]<sup>2+</sup> (Complex **3**) in gas phase at B3LYP//SDD/ 6-311G\*\* level. E = -2372.26643113 Hartree.

|    |              |             |             |
|----|--------------|-------------|-------------|
| Ru | 1.91082172   | -0.00000492 | 0.00000110  |
| N  | 3.41444348   | -1.07354754 | -1.02380083 |
| C  | 3.70153297   | -2.28385731 | -0.45592297 |
| C  | 4.09964026   | -0.71157266 | -2.10971218 |
| C  | 5.08811349   | -1.52040065 | -2.68787130 |
| H  | 3.85236885   | 0.25155603  | -2.53669622 |
| C  | 5.38026035   | -2.74611105 | -2.12702143 |
| H  | 5.60820244   | -1.16902249 | -3.56968240 |
| H  | 6.13916889   | -3.38831654 | -2.55867548 |
| N  | 2.03770738   | -1.75038789 | 1.17108766  |
| C  | 1.33178016   | -2.07639174 | 2.25545610  |
| C  | 2.96022676   | -2.64912413 | 0.71062328  |
| C  | 1.50371294   | -3.28997768 | 2.93618317  |
| H  | 0.60709521   | -1.34896652 | 2.59700324  |
| C  | 3.19929255   | -3.89158124 | 1.33867835  |
| C  | 2.43577187   | -4.20007661 | 2.48367518  |
| H  | 0.89883929   | -3.49426719 | 3.81022654  |
| H  | 2.58568982   | -5.14361289 | 2.99549585  |
| N  | 3.41444930   | 1.07350555  | 1.02382782  |
| C  | 3.70157336   | 2.28380963  | 0.45595539  |
| C  | 4.09962001   | 0.71151630  | 2.10975088  |
| C  | 5.08810019   | 1.52032359  | 2.68792702  |
| H  | 3.85232097   | -0.25160703 | 2.53673105  |
| C  | 5.38028236   | 2.74602786  | 2.12708219  |
| H  | 5.60816651   | 1.16893449  | 3.56974712  |
| H  | 6.13919683   | 3.38821749  | 2.55874946  |
| N  | 2.03776403   | 1.75037588  | -1.17108369 |
| C  | 2.96029421   | 2.64909265  | -0.71060309 |
| C  | 1.33186264   | 2.07639439  | -2.25546429 |
| C  | 3.19939650   | 3.89154503  | -1.33865348 |
| C  | 1.50383186   | 3.28997720  | -2.93618784 |
| H  | 0.60716963   | 1.34898322  | -2.59702419 |
| C  | 2.43590171   | 4.20005678  | -2.48366323 |
| H  | 0.89897779   | 3.49427935  | -3.81024179 |
| H  | 2.58584816   | 5.14359013  | -2.99548099 |
| C  | -0.84557265  | -2.24166413 | -2.63021708 |
| C  | -2.08403132  | -1.84908476 | -2.15783702 |
| C  | -2.15078928  | -0.93772589 | -1.09174398 |
| C  | -0.94154439  | -0.46725387 | -0.55021984 |
| C  | 0.31200205   | -1.72562257 | -2.04243540 |
| C  | -0.94154325  | 0.46731779  | 0.55016595  |
| C  | -2.15078678  | 0.93782119  | 1.09166588  |
| C  | -2.08402653  | 1.84917300  | 2.15776477  |
| H  | -3.00622465  | 2.22203036  | 2.58411223  |
| C  | -0.84556713  | 2.24171715  | 2.63017223  |
| C  | 0.31200596   | 1.72564619  | 2.04241316  |
| H  | -0.75575173  | -2.94278787 | -3.45009886 |
| H  | -3.00623057  | -2.22191982 | -2.58420152 |
| H  | 1.29285018   | -2.01434231 | -2.39587242 |
| H  | -0.75574446  | 2.94283471  | 3.45005909  |
| H  | 1.29285442   | 2.01433703  | 2.39587283  |
| N  | 0.27623053   | 0.85566976  | 1.02642107  |
| N  | 0.27622888   | -0.85564135 | -1.02644733 |
| C  | -3.41574723  | -0.46663872 | -0.53776581 |
| C  | -3.41574590  | 0.46667694  | 0.53766009  |
| N  | -4.54908247  | -0.92427511 | -1.06088731 |
| N  | -4.54907972  | 0.92444011  | 1.06075466  |
| C  | -5.70632370  | -0.47972716 | -0.54810715 |
| C  | -6.93125092  | -0.95386153 | -1.08593143 |
| C  | -5.70632222  | 0.47996655  | 0.54791275  |
| H  | -6.90847355  | -1.66719648 | -1.89897389 |
| C  | -6.93124854  | 0.95386767  | 1.08594456  |
| H  | -6.90846947  | 1.66695929  | 1.89920035  |
| C  | -8.09377200  | -0.47832821 | -0.54385392 |
| C  | -8.09377084  | 0.47849499  | 0.54372873  |
| C  | -10.27615708 | 0.00064849  | -0.00055795 |
| N  | -9.40959161  | 0.73161564  | 0.83160022  |
| H  | -9.76645805  | 1.35480174  | 1.53975401  |
| C  | 4.67816015   | -3.16173747 | -0.97648924 |
| C  | 4.90350865   | -4.41657289 | -0.31845437 |
| C  | 4.19439918   | -4.76652689 | 0.78841059  |
| H  | 5.65352959   | -5.08559633 | -0.72360323 |
| H  | 4.37249816   | -5.71795777 | 1.27557445  |
| C  | 4.67821010   | 3.16166928  | 0.97653839  |
| C  | 4.90359576   | 4.41650033  | 0.31850800  |
| C  | 4.19451216   | 4.76646971  | -0.78836868 |
| H  | 5.65362384   | 5.08550790  | 0.72366979  |
| H  | 4.37263919   | 5.71789713  | -1.27552907 |
| N  | -9.40959319  | -0.73193958 | -0.83129110 |
| H  | -9.76646049  | -1.35609152 | -1.53859345 |
| O  | -11.47250614 | -0.00031809 | 0.00029387  |

**14.** Coordinates of optimized structure of [Ru(phen)<sub>2</sub>dppz-idzo]<sup>2+</sup> (Complex **3**) in water at B3LYP//SDD/6-311G\*\* level. E = -2372.44912082 Hartree.

|    |              |             |             |
|----|--------------|-------------|-------------|
| Ru | 1.90135714   | 0.00000442  | -0.00000256 |
| N  | 3.40262830   | -1.06077655 | -1.03018363 |
| C  | 3.70161875   | -2.26775383 | -0.46358677 |
| C  | 4.07746873   | -0.69109381 | -2.11887639 |
| C  | 5.07064452   | -1.49196050 | -2.70011290 |
| H  | 3.81948112   | 0.26780202  | -2.54708914 |
| C  | 5.37704231   | -2.71390772 | -2.14031045 |
| H  | 5.58137612   | -1.13450020 | -3.58428109 |
| H  | 6.13935844   | -3.35034578 | -2.57343184 |
| N  | 2.03632858   | -1.75037105 | 1.16535856  |
| C  | 1.33630730   | -2.07902511 | 2.25166596  |
| C  | 2.96611650   | -2.63972634 | 0.70384541  |
| C  | 1.52164885   | -3.29054366 | 2.93241626  |
| H  | 0.60818133   | -1.35859225 | 2.59836685  |
| C  | 3.21815275   | -3.87796614 | 1.33241971  |
| C  | 2.46032009   | -4.19234815 | 2.47905465  |
| H  | 0.92117896   | -3.49651230 | 3.80846689  |
| H  | 2.62177564   | -5.13358012 | 2.99070534  |
| N  | 3.40262227   | 1.06079333  | 1.03017910  |
| C  | 3.70160513   | 2.26777304  | 0.46358343  |
| C  | 4.07746422   | 0.69111429  | 2.11887222  |
| C  | 5.07063436   | 1.49198702  | 2.70011003  |
| H  | 3.81948237   | -0.26778336 | 2.54708435  |
| C  | 5.37702464   | 2.71393658  | 2.14030859  |
| H  | 5.58136760   | 1.13452953  | 3.58427839  |
| H  | 6.13933627   | 3.35037930  | 2.57343102  |
| N  | 2.03631939   | 1.75038107  | -1.16536367 |
| C  | 2.96610123   | 2.63974190  | -0.70384896 |
| C  | 1.33629762   | 2.07903106  | -2.25167187 |
| C  | 3.21813010   | 3.87798377  | -1.33242209 |
| C  | 1.52163189   | 3.29055134  | -2.93242111 |
| H  | 0.60817728   | 1.35859321  | -2.59837420 |
| C  | 2.46029652   | 4.19236176  | -2.47905759 |
| H  | 0.92116180   | 3.49651656  | -3.80847240 |
| H  | 2.62174636   | 5.13359523  | -2.99070735 |
| C  | -0.84203964  | -2.22015431 | -2.64669249 |
| C  | -2.08194409  | -1.83366425 | -2.17359733 |
| C  | -2.15139088  | -0.93224868 | -1.10140223 |
| C  | -0.94687930  | -0.46418884 | -0.55377467 |
| C  | 0.31234109   | -1.70716068 | -2.05285860 |
| C  | -0.94688088  | 0.46419053  | 0.55376706  |
| C  | -2.15139397  | 0.93224819  | 1.10139300  |
| C  | -2.08195036  | 1.83366252  | 2.17358934  |
| H  | -2.99799228  | 2.20771000  | 2.61015468  |
| C  | -0.84204733  | 2.22015354  | 2.64668737  |
| C  | 0.31233515   | 1.70716211  | 2.05285492  |
| H  | -0.74727801  | -2.91280702 | -3.47234220 |
| H  | -2.99798472  | -2.20771361 | -2.61016377 |
| H  | 1.29317613   | -1.98899502 | -2.40937025 |
| H  | -0.74728809  | 2.91280518  | 3.47233823  |
| H  | 1.29316916   | 1.98899706  | 2.40936895  |
| N  | 0.27113606   | 0.84663518  | 1.02922213  |
| N  | 0.27113906   | -0.84663232 | -1.02922709 |
| C  | -3.41788855  | -0.46395114 | -0.54308522 |
| C  | -3.41788999  | 0.46394914  | 0.54307369  |
| N  | -4.55155765  | -0.91469909 | -1.06634288 |
| N  | -4.55156032  | 0.91469710  | 1.06632851  |
| C  | -5.71129056  | -0.47266437 | -0.54896087 |
| C  | -6.93666451  | -0.94350988 | -1.09288261 |
| C  | -5.71129188  | 0.47267342  | 0.54893414  |
| H  | -6.91909355  | -1.64958281 | -1.91231515 |
| C  | -6.93666700  | 0.94345939  | 1.09290444  |
| H  | -6.91909805  | 1.64947345  | 1.91238768  |
| C  | -8.09673376  | -0.47114656 | -0.54500283 |
| C  | -8.09673497  | 0.47113537  | 0.54498838  |
| C  | -10.27066883 | 0.00012324  | -0.00012065 |
| N  | -9.42063400  | 0.72170600  | 0.83480133  |
| H  | -9.76806337  | 1.34270475  | 1.54936713  |
| C  | 4.68376018   | -3.13557991 | -0.98707804 |
| C  | 4.92325418   | -4.38716220 | -0.32849191 |
| C  | 4.22076931   | -4.74293941 | 0.78090169  |
| H  | 5.67903276   | -5.04735217 | -0.73665084 |
| H  | 4.40812269   | -5.69094946 | 1.27064356  |
| C  | 4.68374051   | 3.13560514  | 0.98707609  |
| C  | 4.92322682   | 4.38718959  | 0.32849133  |
| C  | 4.22074056   | 4.74296316  | -0.78090256 |
| H  | 5.67900069   | 5.04738416  | 0.73665154  |
| H  | 4.40808828   | 5.69097486  | -1.27064344 |
| N  | -9.42063231  | -0.72183857 | -0.83471318 |
| H  | -9.76806040  | -1.34307682 | -1.54907149 |
| O  | -11.48231190 | -0.00011730 | 0.00008619  |

15. Optimized coordinates of first triplet state/ dark state of [Ru(phen)<sub>2</sub>dppz-idzo]<sup>2+</sup> (Complex 3) in gas phase at TD/B3LYP/SDD/6-311G\*\* level. E (dark state) = -2372.19213950 Hartree, E(S<sub>0</sub>) = -2372.2580907 Hartree.

|    |              |             |             |
|----|--------------|-------------|-------------|
| Ru | 1.92398064   | 0.00000000  | 0.00000114  |
| N  | 3.42526256   | -1.07572571 | -1.02413791 |
| C  | 3.71051960   | -2.28646660 | -0.45648567 |
| C  | 4.11032192   | -0.71506932 | -2.11051720 |
| C  | 5.09710756   | -1.52562340 | -2.68909640 |
| H  | 3.86416990   | 0.24834715  | -2.53747901 |
| C  | 5.38746007   | -2.75179453 | -2.12834504 |
| H  | 5.61728153   | -1.17521645 | -3.57122632 |
| H  | 6.14495349   | -3.39537063 | -2.56040086 |
| N  | 2.04854327   | -1.74969945 | 1.17091258  |
| C  | 1.34143150   | -2.07425566 | 2.25483660  |
| C  | 2.96898437   | -2.65031399 | 0.71030310  |
| C  | 1.51073643   | -3.28845803 | 2.93520445  |
| H  | 0.61828870   | -1.34508358 | 2.59582543  |
| C  | 3.20545040   | -3.89332436 | 1.33804202  |
| C  | 2.44106359   | -4.20036283 | 2.48283878  |
| H  | 0.90522388   | -3.49171029 | 3.80902293  |
| H  | 2.58898933   | -5.14426145 | 2.99454151  |
| N  | 3.42526124   | 1.07573435  | 1.02413298  |
| C  | 3.71050931   | 2.28647644  | 0.45647877  |
| C  | 4.11032723   | 0.71508226  | 2.11050949  |
| C  | 5.09711104   | 1.52564196  | 2.68908394  |
| H  | 3.86418224   | -0.24833535 | 2.53747281  |
| C  | 5.38745451   | 2.75181432  | 2.12833061  |
| H  | 5.61729079   | 1.17523829  | 3.57121177  |
| H  | 6.14494634   | 3.39539475  | 2.56038275  |
| N  | 2.04852849   | 1.74969958  | -1.17091169 |
| C  | 2.96896695   | 2.65031921  | -0.71030686 |
| C  | 1.34141005   | 2.07425160  | -2.25483261 |
| C  | 3.20542356   | 3.89333054  | -1.33804747 |
| C  | 1.51070555   | 3.28845448  | -2.93520189 |
| H  | 0.61826936   | 1.34507572  | -2.59581780 |
| C  | 2.44102995   | 4.20036441  | -2.48284092 |
| H  | 0.90518790   | 3.49170315  | -3.80901766 |
| H  | 2.58894833   | 5.14426359  | -2.99454474 |
| C  | -0.85438384  | -2.24074514 | -2.62595177 |
| C  | -2.08609933  | -1.84584199 | -2.15161292 |
| C  | -2.14961448  | -0.92851994 | -1.08054197 |
| C  | -0.92535479  | -0.46144743 | -0.54287564 |
| C  | 0.31419070   | -1.72628232 | -2.04074565 |
| C  | -0.92535483  | 0.46143518  | 0.54288791  |
| C  | -2.14961469  | 0.92850401  | 1.08055681  |
| C  | -2.08609974  | 1.84582613  | 2.15162770  |
| H  | -3.01056708  | 2.21634053  | 2.57434371  |
| C  | -0.85438432  | 2.24073235  | 2.62596416  |
| C  | 0.31419052   | 1.72627349  | 2.04075509  |
| H  | -0.76777473  | -2.94248388 | -3.44550855 |
| H  | -3.01056670  | -2.21635859 | -2.57432697 |
| H  | 1.29070817   | -2.02162103 | -2.40156296 |
| H  | -0.76777549  | 2.94247143  | 3.44552069  |
| H  | 1.29070791   | 2.02161557  | 2.40156981  |
| N  | 0.29043674   | 0.85852626  | 1.02853611  |
| N  | 0.29043676   | -0.85853478 | -1.02852687 |
| C  | -3.39670508  | -0.46035638 | -0.53070958 |
| C  | -3.39670503  | 0.46033887  | 0.53072491  |
| N  | -4.55980542  | -0.93800087 | -1.07547692 |
| N  | -4.55980567  | 0.93798473  | 1.07548965  |
| C  | -5.70652781  | -0.47440163 | -0.54145622 |
| C  | -6.93986312  | -0.94152420 | -1.07089768 |
| C  | -5.70652807  | 0.47438367  | 0.54146831  |
| H  | -6.91740421  | -1.65556898 | -1.88436062 |
| C  | -6.93986254  | 0.94151724  | 1.07089878  |
| H  | -6.91740510  | 1.65557346  | 1.88435175  |
| C  | -8.14708698  | -0.46188745 | -0.52440311 |
| C  | -8.14708746  | 0.46187431  | 0.52440678  |
| C  | -10.33506351 | -0.00002718 | 0.00001926  |
| N  | -9.46016015  | 0.73012278  | 0.82865381  |
| H  | -9.81038273  | 1.35583431  | 1.53846434  |
| C  | 4.68522001   | -3.16615509 | -0.97749438 |
| C  | 4.90832476   | -4.42143782 | -0.31951781 |
| C  | 4.19878683   | -4.77010112 | 0.78746054  |
| H  | 5.65693284   | -5.09187767 | -0.72490326 |
| H  | 4.37511512   | -5.72194263 | 1.27444321  |
| C  | 4.68520724   | 3.16617046  | 0.97748277  |
| C  | 4.90830240   | 4.42145403  | 0.31950454  |
| C  | 4.19875774   | 4.77011291  | -0.78747089 |
| H  | 5.65690865   | 5.09189812  | 0.72488636  |
| H  | 4.37507873   | 5.72195512  | -1.27445483 |
| N  | -9.46016095  | -0.73010302 | -0.82867897 |
| H  | -9.81038331  | -1.35579302 | -1.53850844 |
| O  | -11.53272243 | 0.00001455  | -0.00001576 |

16. Optimized coordinates of first triplet state/ dark state of [Ru(phen)<sub>2</sub>dppz-idzo]<sup>2+</sup> (Complex 3) in water at TD/B3LYP/SDD/6-311G\*\* level. E(T1) = -2372.37383325 Hartree, E(S<sub>0</sub>) = -2372.4392885 Hartree.

|    |              |             |             |
|----|--------------|-------------|-------------|
| Ru | 1.91377368   | 0.00000083  | -0.00000083 |
| N  | 3.41295445   | -1.06308134 | -1.03086490 |
| C  | 3.71024249   | -2.27035142 | -0.46408308 |
| C  | 4.08737089   | -0.69507769 | -2.12031087 |
| C  | 5.07872742   | -1.49786141 | -2.70203820 |
| H  | 3.83058299   | 0.26409979  | -2.54865347 |
| C  | 5.38350436   | -2.72008495 | -2.14195288 |
| H  | 5.58934944   | -1.14164991 | -3.58676971 |
| H  | 6.14441039   | -3.35799198 | -2.57539009 |
| N  | 2.04724930   | -1.74948707 | 1.16596716  |
| C  | 1.34692008   | -2.07654672 | 2.25250106  |
| C  | 2.97507686   | -2.64062597 | 0.70408078  |
| C  | 1.53037871   | -3.28827426 | 2.93342500  |
| H  | 0.62027983   | -1.35444520 | 2.59888271  |
| C  | 3.22519509   | -3.87912824 | 1.33280041  |
| C  | 2.46731307   | -4.19182816 | 2.47987949  |
| H  | 0.92986304   | -3.49306812 | 3.80971647  |
| H  | 2.62730218   | -5.13324189 | 2.99166253  |
| N  | 3.41295407   | 1.06308063  | 1.03086615  |
| C  | 3.71024592   | 2.27034970  | 0.46408419  |
| C  | 4.08736682   | 0.69507642  | 2.12031422  |
| C  | 5.07872345   | 1.49785859  | 2.70204353  |
| H  | 3.83057583   | -0.26410020 | 2.54865693  |
| C  | 5.38350452   | 2.72008092  | 2.14195783  |
| H  | 5.58934240   | 1.14164680  | 3.58677668  |
| H  | 6.14441092   | 3.35798660  | 2.57539637  |
| N  | 2.04725527   | -1.74948769 | -1.16596939 |
| C  | 2.97508390   | 2.64062488  | -0.70408174 |
| C  | 1.34693004   | 2.07654750  | -2.25250578 |
| C  | 3.22520683   | 3.87912576  | -1.33280221 |
| C  | 1.53039352   | 3.28827371  | -2.93343080 |
| H  | 0.62028933   | 1.35444703  | -2.59888854 |
| C  | 2.46732866   | 4.19182605  | -2.47988375 |
| H  | 0.92988097   | 3.49306772  | -3.80972439 |
| H  | 2.62732150   | 5.13323868  | -2.99166765 |
| C  | -0.85263577  | -2.22053082 | -2.63967641 |
| C  | -2.08594153  | -1.83222729 | -2.16620346 |
| C  | -2.15272869  | -0.92293405 | -1.08857151 |
| C  | -0.93165020  | -0.45876749 | -0.54628406 |
| C  | 0.31395214   | -1.70916720 | -2.04969837 |
| C  | -0.93164990  | 0.45877005  | 0.54628348  |
| C  | -2.15272809  | 0.92293446  | 1.08857362  |
| C  | -2.08594010  | 1.83222837  | 2.16620496  |
| H  | -3.00455868  | 2.20410064  | 2.59836642  |
| C  | -0.85263394  | 2.22053470  | 2.63967461  |
| C  | 0.31395357   | 1.70917218  | 2.04969483  |
| H  | -0.76081015  | -2.91478916 | -3.46440734 |
| H  | -3.00456045  | -2.20410187 | -2.59836226 |
| H  | 1.29007468   | -1.99861319 | -2.41377663 |
| H  | -0.76080770  | 2.91479311  | 3.46440542  |
| H  | 1.29007638   | 1.99861876  | 2.41377193  |
| N  | 0.28492030   | 0.84987466  | 1.03081679  |
| N  | 0.28491961   | -0.84987038 | -1.03081975 |
| C  | -3.39591294  | -0.45530869 | -0.53270731 |
| C  | -3.39591280  | 0.45530280  | 0.53271559  |
| N  | -4.56546926  | -0.93014768 | -1.08296476 |
| N  | -4.56546910  | 0.93013678  | 1.08297769  |
| C  | -5.71449415  | -0.47169143 | -0.54748087 |
| C  | -6.94215959  | -0.93454910 | -1.08207137 |
| C  | -5.71449420  | 0.47165457  | 0.54751638  |
| H  | -6.92863721  | -1.64067934 | -1.90190216 |
| C  | -6.94215986  | 0.93458052  | 1.08204784  |
| H  | -6.92863684  | 1.64082283  | 1.90178222  |
| C  | -8.14933276  | -0.45478277 | -0.52574424 |
| C  | -8.14933302  | 0.45470971  | 0.52581024  |
| C  | -10.32592816 | -0.00033470 | 0.00028923  |
| N  | -9.46788799  | 0.71921439  | 0.83152176  |
| H  | -9.80707902  | 1.34289054  | 1.54826366  |
| C  | 4.69042284   | -3.14010330 | -0.98799998 |
| C  | 4.92821073   | -4.39189233 | -0.32915860 |
| C  | 4.22589463   | -4.74607616 | 0.78085913  |
| H  | 5.68251681   | -5.05355679 | -0.73765950 |
| H  | 4.41189521   | -5.69428593 | 1.27072897  |
| C  | 4.69042691   | 3.14009978  | 0.98800276  |
| C  | 4.92821944   | 4.39188754  | 0.32916070  |
| C  | 4.22590711   | 4.74607182  | -0.78085931 |
| H  | 5.68252613   | 5.05355056  | 0.73766280  |
| H  | 4.41191152   | 5.69428048  | -1.27072982 |
| N  | -9.46788699  | -0.71905053 | -0.83166276 |
| H  | -9.80707616  | -1.34226190 | -1.54880949 |
| O  | -11.54080609 | 0.00008876  | -0.00007777 |

17. Optimized coordinates of first bright triplet state of [Ru(phen)<sub>2</sub>dppz-idzo]<sup>2+</sup> (Complex 3) in gas phase at TD/B3LYP/SDD/6-311G\*\* level. E(³MLCT) = -2372.18622852 Hartree, E(S<sub>0</sub>) = -2372.255753 Hartree.

|    |              |             |             |
|----|--------------|-------------|-------------|
| Ru | 1.94341284   | 0.00204429  | 0.00075061  |
| N  | 3.31078863   | -1.08557454 | -1.00061969 |
| C  | 3.55409936   | -2.35314526 | -0.43490139 |
| C  | 4.09411990   | -0.71293104 | -2.09381931 |
| C  | 5.02052838   | -1.54514744 | -2.64584193 |
| H  | 3.90552128   | 0.27186943  | -2.49541702 |
| C  | 5.23815149   | -2.85169814 | -2.10963773 |
| H  | 5.58854647   | -1.20788663 | -3.50315350 |
| H  | 5.96785654   | -3.51633078 | -2.55236875 |
| N  | 1.95796794   | -1.73869140 | 1.21043661  |
| C  | 1.24253762   | -2.03467928 | 2.29258598  |
| C  | 2.82940153   | -2.69105584 | 0.71141820  |
| C  | 1.33972930   | -3.26371808 | 2.95915585  |
| H  | 0.56804560   | -1.26726312 | 2.65290145  |
| C  | 2.98947568   | -3.96527527 | 1.34251976  |
| C  | 2.21686164   | -4.22792975 | 2.48326592  |
| H  | 0.73234730   | -3.43853881 | 3.83676944  |
| H  | 2.31148809   | -5.18286225 | 2.98773510  |
| N  | 3.44508276   | 1.03414619  | 1.04519201  |
| C  | 3.78295993   | 2.22874284  | 0.47257345  |
| C  | 4.09399089   | 0.63834295  | 2.14175494  |
| C  | 5.10250530   | 1.41102556  | 2.73208295  |
| H  | 3.80334433   | -0.31823288 | 2.55484037  |
| C  | 5.44775288   | 2.62367939  | 2.17080995  |
| H  | 5.59896898   | 1.04221716  | 3.62007974  |
| H  | 6.22602624   | 3.23533348  | 2.61274746  |
| N  | 2.14182796   | 1.74533096  | -1.19178466 |
| C  | 3.08362332   | 2.61142229  | -0.71317587 |
| C  | 1.47552289   | 2.08164480  | -2.29450917 |
| C  | 3.38538192   | 3.83846428  | -1.34324177 |
| H  | 1.70890276   | 3.28340848  | -2.98033593 |
| C  | 0.73737496   | 1.37455706  | -2.65075952 |
| C  | 2.66160191   | 4.16215170  | -2.51071298 |
| H  | 1.13691530   | 3.50073741  | -3.87303850 |
| H  | 2.86002085   | 5.09364805  | -3.02812478 |
| C  | -0.83815003  | -2.30064055 | -2.54291155 |
| C  | -2.07558875  | -1.88394649 | -2.09091236 |
| C  | -2.14514200  | -0.92833122 | -1.06337407 |
| C  | -0.93636638  | -0.43991564 | -0.53887457 |
| C  | 0.32183012   | -1.76712618 | -1.97432963 |
| C  | -0.93601407  | 0.53694302  | 0.52313007  |
| C  | -2.14543655  | 1.03052793  | 1.04308483  |
| C  | -2.07626707  | 1.98404448  | 2.07222056  |
| H  | -2.99864767  | 2.37367530  | 2.48331081  |
| C  | -0.83876676  | 2.39653268  | 2.52933991  |
| C  | 0.31869481   | 1.85756497  | 1.96205782  |
| H  | -0.74787107  | -3.03588918 | -3.33204512 |
| H  | -2.99767276  | -2.27185285 | -2.50420052 |
| H  | 1.30522662   | -2.07133171 | -2.30474936 |
| H  | -0.74930524  | 3.12957022  | 3.32067715  |
| H  | 1.29910273   | 2.16124709  | 2.30474064  |
| N  | 0.27803465   | 0.94588333  | 0.98495872  |
| N  | 0.27726610   | -0.85523293 | -0.99751482 |
| C  | -3.40983416  | -0.43272252 | -0.53177721 |
| C  | -3.40981705  | 0.54012742  | 0.50755342  |
| N  | -4.54332446  | -0.90699778 | -1.03976480 |
| N  | -4.54268703  | 1.01882893  | 1.01325818  |
| C  | -5.70031452  | -0.44223055 | -0.54497054 |
| C  | -6.92506389  | -0.93283240 | -1.06681733 |
| C  | -5.69999400  | 0.55692430  | 0.51726738  |
| H  | -6.90312674  | -1.67444014 | -1.85407940 |
| C  | -6.92432002  | 1.05028194  | 1.03797236  |
| H  | -6.90157297  | 1.79141966  | 1.82566369  |
| C  | -8.08752221  | -0.43740701 | -0.54190254 |
| C  | -8.08714528  | 0.55686998  | 0.51242995  |
| C  | -10.26903536 | 0.06122705  | -0.01528435 |
| N  | -9.40203427  | 0.82089335  | 0.79064881  |
| H  | -9.75868470  | 1.46791418  | 1.47737666  |
| C  | 4.49721362   | -3.25511351 | -0.97685848 |
| C  | 4.65328720   | -4.52570741 | -0.33617129 |
| C  | 3.92743482   | -4.87189393 | 0.77432430  |
| H  | 5.37265475   | -5.22262154 | -0.75030189 |
| H  | 4.06615363   | -5.84177789 | 1.23737738  |
| C  | 4.78396346   | 3.06785493  | 1.00697372  |
| C  | 5.07304346   | 4.30859646  | 0.34750366  |
| C  | 4.40102503   | 4.67832455  | -0.77653274 |
| H  | 5.84209482   | 4.94894333  | 0.76284059  |
| H  | 4.62817434   | 5.61771117  | -1.26648045 |
| N  | -9.40253831  | -0.69944468 | -0.82094221 |
| H  | -9.75963738  | -1.34714011 | -1.50683847 |
| O  | -11.46492043 | 0.06198232  | -0.01555008 |

18. Optimized coordinates of first bright triplet state of [Ru(phen)<sub>2</sub>dppz-idzo]<sup>2+</sup> (Complex 3) in water at TD/B3LYP/SDD/6-311G\*\* level. E(³MLCT) = -2372.36815507 Hartree E(S<sub>0</sub>) = -2372.4377589 Hartree.

|    |              |             |             |
|----|--------------|-------------|-------------|
| Ru | 1.94648189   | 0.00585730  | -0.00078317 |
| N  | 3.42592419   | -1.05435975 | -1.04122168 |
| C  | 3.74317130   | -2.25031842 | -0.46168859 |
| C  | 4.07017077   | -0.67889134 | -2.14635992 |
| C  | 5.05989211   | -1.47525228 | -2.73632645 |
| H  | 3.79044182   | 0.27507684  | -2.57097163 |
| C  | 5.38825484   | -2.68740703 | -2.16628637 |
| H  | 5.55137685   | -1.12361272 | -3.63309567 |
| H  | 6.14992606   | -3.31865273 | -2.60803143 |
| N  | 2.10777700   | -1.73370733 | 1.19636971  |
| C  | 1.42814905   | -2.05342793 | 2.29460849  |
| C  | 3.03644600   | -2.61566845 | 0.72406793  |
| C  | 1.63779532   | -3.25784094 | 2.98321131  |
| H  | 0.69981083   | -1.33539802 | 2.64610161  |
| C  | 3.31379122   | -3.84445102 | 1.35825087  |
| C  | 2.57817088   | -4.15268472 | 2.52195506  |
| H  | 1.05522060   | -3.46169174 | 3.87141387  |
| H  | 2.75852039   | -5.08636713 | 3.04084239  |
| N  | 3.31980262   | 1.06465368  | 1.00286711  |
| C  | 3.58858130   | 2.33012992  | 0.44228848  |
| C  | 4.08825863   | 0.67565967  | 2.10340692  |
| C  | 5.02497371   | 1.49198905  | 2.66071160  |
| H  | 3.87761385   | -0.30517077 | 2.50203342  |
| C  | 5.27112844   | 2.79663529  | 2.12813482  |
| H  | 5.57973048   | 1.14181376  | 3.52167658  |
| H  | 6.00972414   | 3.44859099  | 2.57503992  |
| N  | 1.99183191   | 1.74227104  | -1.20807903 |
| C  | 2.87560151   | 2.68085818  | -0.70706079 |
| C  | 1.28955943   | 2.04360601  | -2.29470028 |
| C  | 3.06094957   | 3.94994907  | -1.33915349 |
| C  | 1.41072806   | 3.27215678  | -2.96289032 |
| H  | 0.60816986   | 1.28615386  | -2.66037051 |
| C  | 2.29864480   | 4.22315395  | -2.48559772 |
| H  | 0.81076883   | 3.45105317  | -3.84450965 |
| H  | 2.41232345   | 5.17535536  | -2.99102433 |
| C  | -0.83005919  | -2.34682602 | -2.56447182 |
| C  | -2.06793418  | -1.93994993 | -2.10585854 |
| C  | -2.13886568  | -0.99817588 | -1.06834877 |
| C  | -0.93410720  | -0.51045601 | -0.54088372 |
| C  | 0.32518046   | -1.81462017 | -1.98851679 |
| C  | -0.93410653  | 0.45935169  | 0.53015590  |
| C  | -2.13769382  | 0.94426771  | 1.06282565  |
| C  | -2.06523588  | 1.88757979  | 2.09875852  |
| H  | -2.98142275  | 2.27514984  | 2.52323628  |
| C  | -0.82677873  | 2.29801010  | 2.55281902  |
| C  | 0.32874407   | 1.76801758  | 1.97585072  |
| N  | -0.73589050  | -3.07050549 | -3.36272092 |
| H  | -2.98461874  | -2.32968626 | -2.52728280 |
| H  | 1.30455391   | -2.11463822 | -2.33378156 |
| H  | -0.73209863  | 3.02247223  | 3.35032221  |
| H  | 1.31248421   | 2.06290084  | 2.31174328  |
| N  | 0.27862318   | 0.86838996  | 0.98877340  |
| N  | 0.27906268   | -0.91580409 | -1.00101666 |
| C  | -3.40479254  | -0.51150988 | -0.52626982 |
| C  | -3.40425999  | 0.45219125  | 0.52695384  |
| N  | -4.53801784  | -0.98239395 | -1.03233061 |
| N  | -4.53707301  | 0.91744328  | 1.03915186  |
| C  | -5.69711628  | -0.52616846 | -0.52714227 |
| C  | -6.92233042  | -1.01721723 | -1.05234880 |
| C  | -5.69664405  | 0.45501786  | 0.54059068  |
| H  | -6.90514227  | -1.74911141 | -1.84871355 |
| C  | -6.92150469  | 0.93905935  | 1.07309804  |
| H  | -6.90376434  | 1.67121746  | 1.86920614  |
| C  | -8.08203813  | -0.53097915 | -0.51599383 |
| C  | -8.08163501  | 0.44569899  | 0.54410381  |
| C  | -10.25530501 | -0.04959266 | 0.02118993  |
| N  | -9.40464073  | 0.70111685  | 0.82994402  |
| H  | -9.75177714  | 1.34322840  | 1.52583320  |
| C  | 4.72510597   | -3.10995069 | -0.99478220 |
| C  | 4.99374226   | -4.35109652 | -0.32874087 |
| C  | 4.31571389   | -4.70334313 | 0.79727150  |
| H  | 5.75046740   | -5.00533361 | -0.74378864 |
| H  | 4.52336576   | -5.64356995 | 1.29324530  |
| C  | 4.54364955   | 3.21457468  | 0.99078022  |
| C  | 4.72473093   | 4.48144974  | 0.34994570  |
| C  | 4.01105333   | 4.83963615  | -0.76649049 |
| H  | 5.45380926   | 5.16587506  | 0.76838631  |
| H  | 4.16905432   | 5.80600900  | -1.23080875 |
| N  | -9.40522542  | -0.79470113 | -0.79329908 |
| H  | -9.75277670  | -1.43950131 | -1.48649217 |
| O  | -11.46652580 | -0.05359107 | 0.02530700  |
